## Local structure-function relationships in human brain networks across the human lifespan

Farnaz Zamani Esfahlani<sup>1</sup>, Joshua Faskowitz<sup>1,2</sup>, Jonah Slack<sup>1</sup>, Bratislav Mišić<sup>5</sup>, and Richard F. Betzel<sup>1-4\*</sup>

<sup>1</sup>*Department of Psychological and Brain Sciences,*

<sup>2</sup>*Program in Neuroscience,* <sup>3</sup>*Cognitive Science Program,*

<sup>4</sup>*Network Science Institute, Indiana University, Bloomington, IN 47405*

<sup>5</sup>*McConnell Brain Imaging Centre, Montréal Neurological Institute, McGill University, Montréal, Quebec, Canada*

(Dated: May 23, 2021)

The human connectome is the set of physical pathways linking brain regions to one another. Empirical and *in silico* studies have demonstrated that the structure of this network helps shape patterns of functional coupling between brain regions. To better understand this link between structure and function, a growing number of studies have derived geometric, dynamic, and topological predictors from structural connectivity in order to make predictions about correlation structure. These studies, however, have typically focused on global (whole-brain) predictions using a restricted set of predictors. Here, we investigate a wide range of predictors and shift focus onto predictions of local (regional) patterns of functional coupling. We show that, globally, no individual predictor performs well and, that even the best predictors are largely driven by their ability to predict functional coupling between directly connected regions. We then use the same predictors to make predictions of local coupling and find marked improvement. Notably, the most predictable local FC is linked to sensorimotor regions, which are best predicted by measures based on topological similarity, mean first passage times of random walkers, and the brain's embedding in Euclidean space. We then show that by combining the predictive power of more than one predictor using multi-linear models, we can further improve local predictions. Finally, we investigate how global and local structure-function coupling changes across the human lifespan. We find that, globally, the magnitude of coupling decreases with biological age, which is paralleled by an increase in the number of multi-step pathways. We also show that, locally, structure-function coupling is preserved in higher order cognitive systems, but preferentially decreases with age in sensorimotor systems. Our results illuminate the heterogeneous landscape of structure-function coupling across the cerebral cortex and help clarify its changes with age.

### INTRODUCTION

The human connectome constitutes the complete set of neural elements and their anatomical connections to one another [1]. At the macroscale, the connectome can be represented as a graph or network whose nodes and edges correspond to brain regions and white-matter fiber tracts [2]. The topological organization of the connectome is non-random and exhibits small-world architecture [3], hubs and rich clubs [2, 4], modules [5], and cost-effective spatial embedding [6]. These structural features constrain patterns of inter-areal communication [7–10], inducing correlations in regional activity, i.e. functional connectivity [11, 12].

Estimates of connectomes and functional networks can be obtained easily thanks to easy-to-use processing and reconstruction pipelines [13, 14]. However, linking the two connective modalities to one another has proven challenging, leading to many different approaches [15, 16]. Some of the earliest studies of structure-function coupling constrained generative, biophysical models of brain activity with anatomical connections, noticing that the correlation structure of the synthetic time series output by the model was, itself, correlated with both the

anatomical network and empirical functional connectivity [7, 8, 17, 18]. Other studies have opted for a simpler, albeit amechanistic, approach and computed correlations between anatomical and functional connection weights [2, 19], sometimes using multivariate methods [20].

Although scientifically profitable, both approaches have limitations. Biophysical models, for instance, entail high computational costs that preclude exhaustive searches of parameter spaces. Conversely, statistical and correlative approaches provide limited insight into the mechanisms that support structure-function coupling. Situated between these two extremes, however, are stylized models of interregional communication [12]. In general, these models are based on simple dynamical processes, e.g. diffusion [11], epidemic spreading [21], shortest-paths routing [22], whose solutions can be expressed analytically, and entail low computational costs. As a result, this approach allows users to flexibly implement and adjudicate between different models of communication [23].

Although communication models are becoming increasingly common and have been used recently to study individual differences in phenotypes and traits [24], cognition [25], and for subject identification [26], there remain many open questions and frontiers. First, most studies focus on a select set of communication measures and do not compare the performance of those measures against other models. Second, most studies have focused

---

\* rbetzel @ indiana.edu

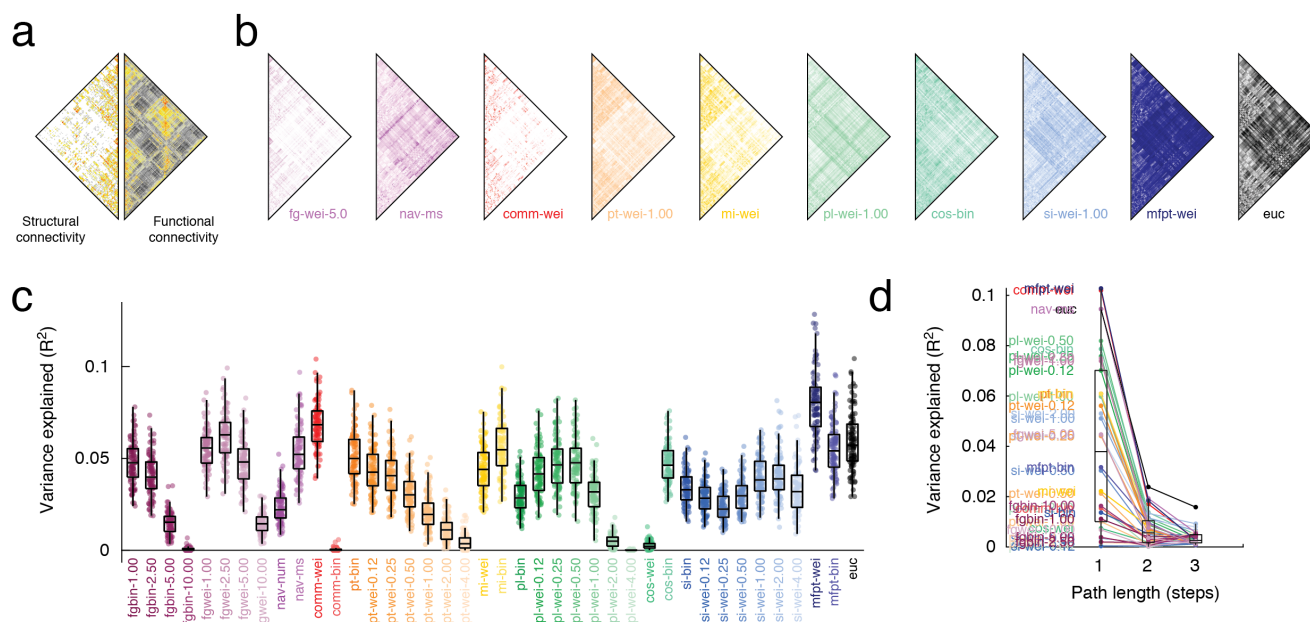

**FIG. 1. Whole-brain functional connectivity is heterogeneous and not fully explained by any factor.** (a) Whole-brain structural and functional connectivity data from the *HCP* dataset. (b) We used a series of dynamic, topological, and geometric models to transform sparse SC matrices into fully-weighted matrices (predictors). Here, we show examples: flow graphs (*fg-wei-5.0*), navigation (*nav-ms*), communicability (*comm-wei*), path transitivity (*pt-wei-1.00*), matching index (*mi-wei*), path length (*pl-wei-1.00*), cosine similarity (*cos-wei*), search information (*si-wei-1.00*), mean first passage time (*mfpt-wei*), and Euclidean distance (*euc*). (c) Variance in whole-brain FC weights explained by factors. Each point represents a subject. (d) Decreases in variance explained as a function of path lengths (hops).

on using communication models to explain variation in whole-brain functional connectivity. In contrast, several recent studies have shown that structure-function coupling is heterogeneous across the cortex [27, 28], suggesting variation in the underlying communication process and motivating further study. Finally, neither of these questions have been addressed in an applied context. Consider, for instance, the human lifespan. Although many studies have independently documented changes in structural [29–31] and functional connections [32, 33] through development, maturation, and adulthood, how they evolve jointly in terms of communication models and at the level of brain regions is unknown [25, 34].

Here, we address these limitations directly. Using data from the Human Connectome Project [35], we show that at the single-subject level, communication models (predictors) fit at the regional level outperform those fit globally. We also find that predictors based on path length perform poorly, whereas predictors that describe and decentralized communication processes perform better. We also show that the variance explained in regional functional connectivity follows a system-specific pattern, with primary sensory systems being more predictable than heteromodal systems. Relatedly, we also find that the distribution of optimal factors vary by brain system. Next, we explore more synergies among predictors, using multi-linear models to predict the weights of functional

connections. We find that, among the optimal pairings, a relatively small number of predictors appeared disproportionately often, forming a core set of predictors that, collectively, is essential for predicting regional FC. Finally, we analyze data from the extended Nathan Kline Institute lifespan sample [36]. We show that, globally, FC becomes less explainable across the lifespan, irrespective of best predictor. However, we also show that the prevalence of certain predictors vary stereotypically with age and, although FC predictability decreases with age, the regional pattern of predictability was heterogeneous and largely spared systems associated with executive function and introspection (control and default mode networks).

## RESULTS

Here, we explore three interrelated questions: Which communication model best explains observed patterns of FC? How does the optimal model vary across cortex? Does the magnitude of coupling and the optimal model vary over the course of the human lifespan? To test these hypotheses, we analyzed two separate structure-function datasets. The first comes from the Human Connectome Project [35] and includes structural and functional connectivity (SC; FC) data from 100 individuals. The second dataset comes from the Nathan Kline Institute-Rockland

lifespan sample [36] and includes SC and FC data from 542 individuals. In the following sections, we analyze cortical networks parcellated into  $N = 400$  regions of interest [37]. For details concerning data processing and network definition, see **Materials and Methods**.

Our analyses are divided into several sections. In the section **Global structure-function coupling is not fully explained by any factor**, we investigate individual heterogeneity in terms of which factors best predict whole-brain patterns of FC. Then, in the section **Regional structure-function coupling is heterogeneous**, we investigate both regional and inter-individual variability in the optimal factor for predicting the FC profiles of single brain regions. Then, in the section **Exploiting synergies among predictors leads to increased explanatory power**, we use multi-linear models to explain regional patterns of FC. Finally, in the section **Structure-function coupling weakens across the human lifespan**, we analyze lifespan changes in structure-function relationships as assessed using communication models.

#### Global structure-function coupling is not fully explained by any factor

Recent work has focused on using simple, stylized models to transform sparse SC data into fully-weighted matrices to explain variation in whole-brain patterns of FC (Fig. 1a). In most applications, only a few predictors are investigated, making it difficult to assess the relative performances of different predictors.

Here, we generate a large number of matrices based on SC data from individual subjects. These transformations yield a distinct geometric, topological, or dynamic factor that can then be used to explain variation inter-regional FC. Broadly, we focused on ten classes of predictors: flow graphs parameterized at different timescales [38], two based on greedy navigation [39], two based on communicability [40, 41], seven based on path transitivity parameterized at different weight-to-cost transformations [11], two based on the matching index [42], seven based on path length parameterized at different weight-to-cost transformations, two based on cosine similarity, seven based on search information parameterized at different weight-to-cost transformations [43], mean first passage times of random walkers [44], and Euclidean distance. In total, we explored 40 different predictors. In Fig. 1b we show examples of several predictors for a single subject.

First, we assessed whether the FC variance explained was different from one predictor to another. In general, we found high levels of heterogeneity across predictors in terms of their ability to explain the variance in empirical FC (one-way ANOVA;  $F(39) = 326.6$ ;  $p < 10^{-15}$ ; Fig. 1c). At a single subject level, no predictor explained more than 10.46% of variance. Aggregating across subjects, the best predictors were weighted mean first passage time (*mfpt-wei*;  $R^2 = 0.079 \pm 0.031$ ), weighted com-

municability (*comm-wei*;  $R^2 = 0.068 \pm 0.024$ ), the flow graph estimated at a Markov time of  $t = 2.5$  (*fgwei-2.50*;  $R^2 = 0.061 \pm 0.026$ ), and Euclidean distance (*euc*;  $R^2 = 0.058 \pm 0.032$ ). The remaining factors all explained less variance. Note that these general trends persist, irrespective of whether we examine whole-brain connectivity data or connectivity data based on single hemispheres (see Fig. S1).

Across all factors, we found that the majority of variance explained can be attributed to one-step (direct) connections (Fig. 1c). Isolating these connections alone, we found that the average variance explained increased (from 0.035% to 0.041%; paired sample t-test,  $p = 8.5 \times 10^{-4}$ ). However, for multi-step paths, the variance explained decreased substantially.

Collectively, these results suggest that whole-brain FC is not well explained by any single factor in isolation ( $\max(R^2) \approx 0.1$ ) and that the weights of direct connections are more easily explained than indirect connections. Both of these results are in line with previous studies [11] and motivate further investigation into structurally-based explanatory predictors of FC.

#### Regional structure-function coupling is heterogeneous

In the previous section we focused on explaining variance in whole-brain FC using a series of predictors obtained by transforming the SC matrix. In general, we found high levels of heterogeneity and weak correspondence between FC and predictors. In order to achieve better explanatory power, several recent studies have focused on regional patterns of FC – functional fingerprints – and explaining variance in FC from the perspective of individual nodes [27, 28, 45]. However, these studies were limited in scope to a select set of predictors. Here, we use the same set of 40 predictors to explain regional patterns of FC and identify the optimal factors for each region and brain system.

To explain regional patterns of FC, we fit linear models wherein every row (or equivalently column) in the FC matrix are explained based on the same row in a predictor matrix. Repeating this procedure for every region, predictor, and subject returns a matrix of  $R^2$  values whose dimensions are  $[400 \times 40 \times 95]$ . To visualize these results, we averaged over subjects and plotted the mean variance explained for each region and predictor (Fig. 2a). As in the previous section, we found considerable variability across predictors (one-way ANOVA;  $F(39) = 326.6$ ;  $p < 10^{-15}$ ) but also across regions (one-way ANOVA;  $F(39) = 141.5$ ;  $p < 10^{-15}$ ), confirming that both regions and predictors differ from one another in terms of their mean variance explained. We also compared the spatial similarity between predictors (the similarity of the  $400 \times 1$  vectors of variance explained at each region) and used an embedding algorithm to assign predictors locations in two-dimensional space based on that similarity

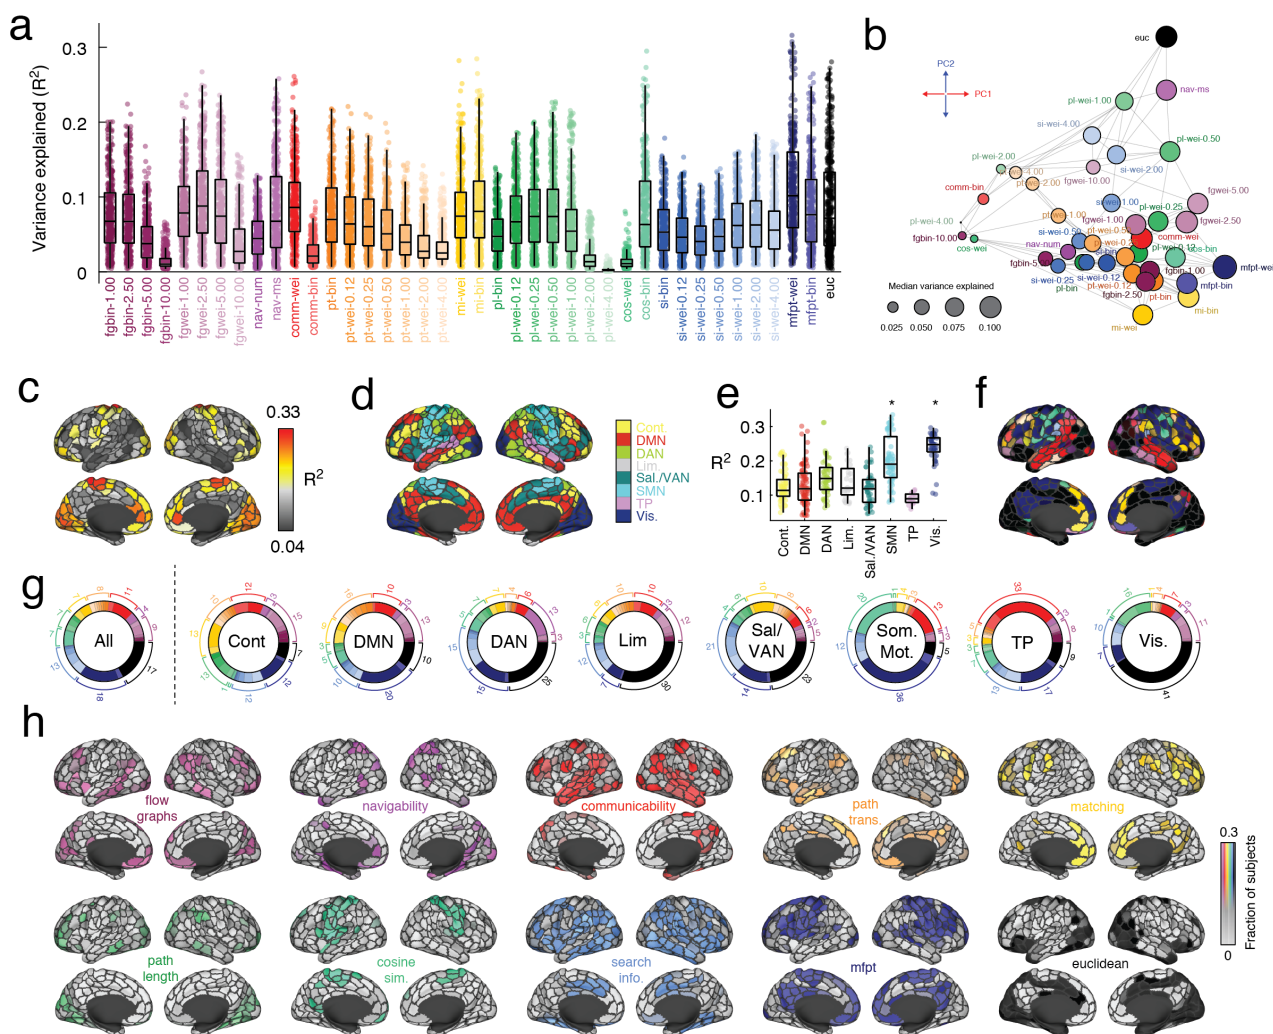

**FIG. 2. Explaining regional FC fingerprints with dynamic, topological, and geometric factors.** (a) Distributions of variance explained by different factors. Points represent brain regions and the mean variance explained across the entire cohort. (b) Embedding graph of factors based on their similarity to one another. The closer two points are to one another, the more similar the pattern of explained variance is (based on principal components analysis of regional variance explained matrix). The size of points is proportional to the mean variance explained across all brain regions. (c) The maximum variance explained for each brain region by any of the factors. (d) Brain systems mapped onto cortical surface. (e) Maximum variance explained grouped by brain system. (f) Surface projection of the factors that best explain each region's FC fingerprint. (g) For each subject we calculated the most predictive factor for every brain region. Here, we group these factors at the level of the entire cerebral cortex (*All*) and at the level of individual systems. (h) For each region and factor, we calculated the fraction of subjects for which that factor explained the most variance. Here, we project these values to the cortical surface.

(Fig. 2b).

In general, we found that models seeking to explain local (i.e. regional) variation in FC outperform global models. For each region, we calculated the maximum variance explained by any model and found values, in some cases, that exceed 33% variance (Fig. 2c). Interestingly, the magnitude of variance explained was, itself, variable across cortex and concentrated within specific sets of brain systems (Fig. 2d,e). In particular, we found that the FC patterns of regions in the somatomotor and visual network were better explained than those of regions in

other brain systems (1,000 spin test permutations [46]; false-discovery rate fixed at 5%;  $p_{adjusted} = 0.00368$ ). Irrespective of brain region, we found that Euclidean distance (*eucl*), weighted mean first passage time (*mfpt-wei*), weighted communicability (*comm-wei*), binary cosine similarity (*cos-bin*), and the length of navigation paths in units of Euclidean distance (*nav-ms*), were the most common across subjects, being classified as optimal for 16.3, 15.8, 8.3, 6.1, and 5.1 percent of brain regions. In contrast, the predictors that were least likely to be considered optimal included measures of binary and

weighted shortest paths, search information, and flow graphs at long Markov times (See Fig. S2 for complete ranking).

Relatedly, we observed that the predictors associated with the maximum variance explained varied across regions and systems (Fig. 2f). We found that within every brain system certain predictors were overexpressed relative to their baseline rate. Consider the visual system, for instance (Fig. 2g). At the population level, 41% of visual regions exhibited FC patterns that were best predicted by their Euclidean distance from other regions. In comparison, the FC patterns of only 7% of control regions were best explained by Euclidean distance (the whole-brain rate is 17%). Interestingly, we found that the control and default mode networks diverged from the whole-brain levels at the highest rate, with 16 and 20 of the 40 predictors overexpressed in these systems, respectively (40% and 50%). In contrast, sensorimotor systems (somatomotor and visual) overexpressed only seven and five predictors, respectively (17.5% and 12.5%). These observations align with the putative functional roles of these systems – control and default mode are thought to be polyfunctional while sensorimotor systems subtend a narrower set of functions related to processing specific modalities of information.

Indeed, the predictors were differentially associated with brain regions and systems. To better understand exactly which regions were best explained by a given predictor, we grouped predictors into ten broad classes and calculated how each region’s FC pattern was best explained by each class of predictor across the 95 subjects (Fig. 2h). To assess whether these regional patterns of predictor preference were preferentially expressed within distinct brain systems, we averaged their scores by systems [37] and compared these averages with those obtained under a spatially-aware permutation model [46, 47] (1000 permutations; false discovery rate fixed at 5% leading to adjusted critical value of  $p_{adj} = 0.0085$ ). For instance, we found over-expressions of flow graphs within the control and default mode networks, navigability within the dorsal attention network, communicability in temporoparietal network, path transitivity in default mode, matching index within control network, path length within the visual and control networks, cosine similarity within the somatomotor network, search information within the control network, and mean first passage time within the temporoparietal network. Interestingly, as a predictor Euclidean distance was not overexpressed within any system, suggesting it lacked clear system specificity.

Finally, we calculated for each region the fraction of subjects for whom each of the 40 predictors was optimal. We treated this distribution as a “fingerprint” for each region, describing its preference for one predictor or another. Then, we computed the similarity of these fingerprints for every pair of brain regions, resulting in  $400 \times 400$  correlation matrix, which we then clustered using modularity maximization. We found evidence of ten consensus communities, four of which were large and were

investigated further (Fig. S3). In general, each of these four communities over-expressed a single specific predictor. Namely, weighted mean first passage time (cluster 1), Euclidean distance (cluster 2), weighted communicability (cluster 3), and weighted matching index (cluster 4) (Fig. S3c).

Collectively, these results suggest that global models of interregional communication may fail to account for regional preferences in communication patterns. By fitting explanatory models at the level of regions, we can expose these preferences and heterogeneity across the cerebral cortex in terms of regional predictability.

### Exploiting synergies among predictors leads to increased explanatory power

In the previous two sections, we demonstrated that at the whole-brain level, measures of communication explained a small fraction of variance in FC, but could be improved upon by modeling FC at the level of individual brain regions. In both cases, we modeled FC linearly in terms of one predictor and a constant. However, several studies have examined the extent to which combinations of predictors, e.g. search information and Euclidean distance [11, 23, 28] led to an improvement in variance explained when combined in a multilinear model. Here, we focus on local models while simultaneously building upon those earlier studies to systematically explore all possible combinations of terms.

We constructed linear models of FC based on pairs of predictors. With 40 predictors this yields  $40 \times 39/2 = 780$  unique dyads, which we used to explain regional FC variance. To reduce the total number of dyads, we performed the following greedy analysis. For each subject and region, we identified the predictor that explained the greatest fraction of variance in its FC. Then, of the remaining 39 predictors, we identified the one that, when included in the multilinear model, yielded the greatest performance improvement. Then, we counted how frequently specific pairs of predictors appeared together in the multilinear models and summarized the results as a square predictor  $\times$  predictor matrix (Fig. 3a). Interestingly, we found that the counts followed a heavy tailed distribution, such that a small fraction of predictor pairs appeared disproportionately more frequently than others (Fig. 3b). When we considered the marginal distribution (Fig. 3a, bar plot at the top of the matrix), we found that Euclidean distance, weighted mean first passage time, weighted communicability, weighted search information (with  $\gamma = 4$ ), and navigability participated in the most dyads, suggesting that these factors, when paired with others, are important for explaining regional patterns of FC.

To better understand the interrelationships among predictors, we modeled the matrix in Fig. 3a as a graph, where nodes and edges correspond to predictors and the frequency with which predictor pairs appear, respectively

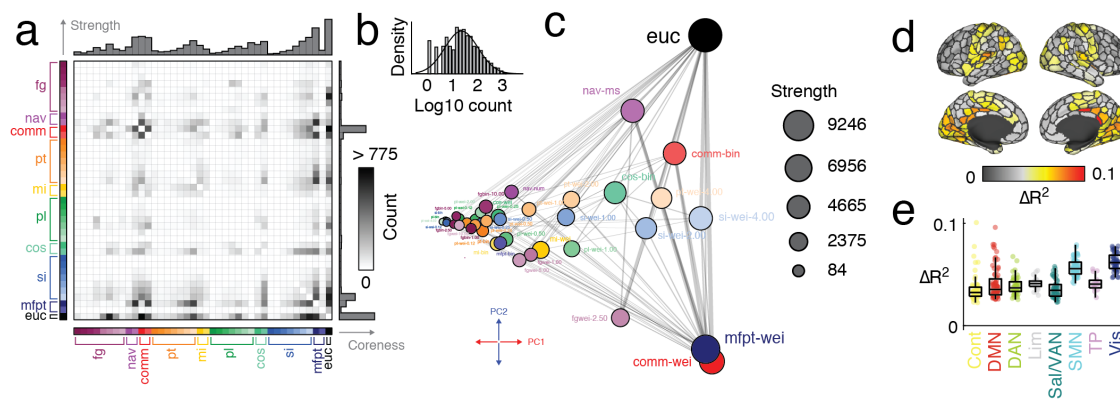

**FIG. 3. Pairwise synergies between predictors.** We used two-predictor multi-linear models to predict regional patterns of FC and identified the optimal pair of predictors for each region and each subject. We then counted how frequently each pair of predictors appeared in the set of optimal predictors. This procedure yields a symmetric matrix of counts (a). The counts were approximately log-normally distributed (b). The matrix could be modeled as a graph and each node’s (predictor’s) coreness could be directly calculated (node positions based on principal components analysis of count matrix) (c). We also calculated the mean regional improvement in  $R^2$  from using the multi-linear model *versus* the model with a single predictor. (d) Improvement ( $\Delta R^2$ ) projected onto the cortical surface. (e) Improvement grouped by canonical brain systems.

(see Fig. 3c for an embedding of the network in two-dimensional space). Upon visual examination of the connectivity matrix, it appeared that a small fraction of predictors broadly interacted with others while the remaining predictors weakly interacted with one another. This type of organization is hallmark of core-periphery meso-scale structure, where a densely-connected core of nodes projects to a sparsely connected periphery. To test whether this type of structure was present, we applied a core-periphery detection algorithm that, rather than a binary classification of a node as “core” or “peripheral”, assign each node a parameterized and continuous measure of coreness. Here, we systematically varied the two parameters –  $\alpha$  and  $\beta$  – which control, roughly, the smoothness of the distinction between core and periphery and the number of nodes in the core, respectively. We aggregated coreness scores over the top 5% of parameter pairs to obtain a mean coreness score for every node (see Fig. S4). As expected, the predictors with the highest levels of coreness included Euclidean distance, weighted communicability, weighted mean first passage time, and search information (with  $\gamma = 4$ ) (Fig. 3a; right margin). With the exception of Euclidean distance, all of these measures are based on diffusive, decentralized dynamics. Mean first passage time and search information concern random walks over a network, while communicability is associated with the ensemble of multi-step walks through a network. In contrast, measures based on shortest-paths routing (weighted and binary shortest paths) fall squarely in the periphery.

In the previous analyses, we examined synergies between pairs of predictors. Specifically, we focused on how synergies vary across the brain, which regions are associated the greatest improvements, and what pairs of predictors drive these improvements? First, we compared

the increase in explained variance ( $\Delta R^2$ ) as a result of including the second predictor. As expected, all changes in variance explained were positive (Fig. 3d) and were largely concentrated in somatosensory systems (Fig. 3e), suggesting that the biggest increases were associated with regions and systems whose baseline  $R^2$  was among the greatest prior to introducing a second predictor.

Collectively, these results demonstrate that improvements gained by using multiple predictors to explain FC have distinct spatial topography, favoring unimodal sensory systems. Moreover, even with multiple predictors, the predictability of FC in heteromodal cortices improves little.

### Structure-function coupling weakens across the human lifespan

In the previous sections we systematically evaluated the utility of different structural predictors for explaining variance in regional patterns of FC. Those analyses were carried out using data from the Human Connectome Project and included subjects of, roughly, the same age range (young adult; 18-30 years). In this section, we use data from the enhanced Nathan Kline Institute-Rockland sample, which comprises 542 individuals from the Rockland, NY community whose ages range from childhood through senescence (7-85 years). Specifically, we focus on the magnitude of structure-function coupling across the lifespan and changes in the optimal predictor as a function of age.

First, we assessed how changes in global structure-function correspondence varied with age. To do this, we calculated the maximum  $R^2$  for each participant across all predictors. Then, to rule out the possibility that inter-

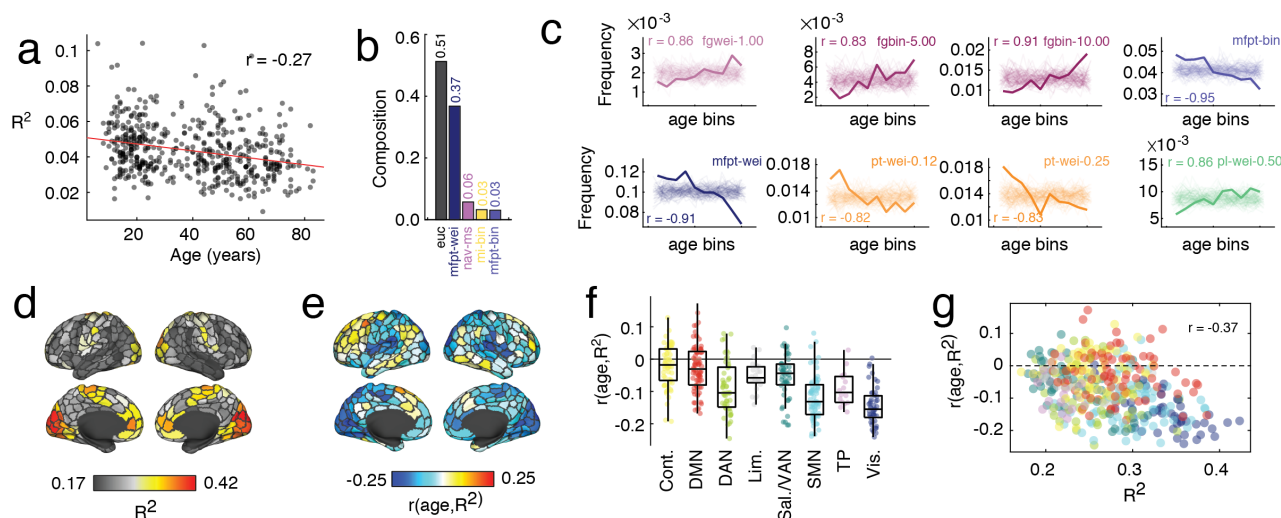

**FIG. 4. Lifespan variation in structure-function coupling based on communication models.** (a) Decreases in whole-brain variance explained across the lifespan. (b) Distribution of optimal predictors for each subject across the lifespan. (c) We grouped subjects into 10 bins based on their ages and calculated, for each bin, the frequency with which different predictors were optimal for explaining regional patterns of FC. (d) Whole-brain pattern of variance explained. (e) Correlation of variance explained with age projected onto the cortical surface. (f) Correlation of variance explained grouped by brain system. (g) Scatterplot of variance explained *versus* the correlation of variance explained and age.

individual differences in variance explained is related to differences in sex, time of visit (for data acquisition), or global network properties like total weight and binary density, we regressed these values out of each subjects'  $R^2$  value. The residuals obtained following this procedure are, by definition, orthogonal to those nuisance variables. Finally, we calculated the linear correlation of these residuals with subjects' ages and observed that the two were significantly associated with one another ( $r = -0.27$ ;  $p = 2.5 \times 10^{-10}$ ); Fig. 4a, suggesting that the magnitude of structure-function correspondence decreases monotonically with age. Globally, the most common optimal predictors of FC were Euclidean distance (51% of participants) and weighted mean first passage time (37%) (Fig. 4b).

The previous analysis focused on global coupling between structure and function. Next, we investigated age-related changes in structure-function coupling at a local (regional) level. As with the global analysis, we regressed out the effect of sex, time of visit, and global network properties. Because we were examining effects at the level of individual nodes, we also regressed out the effect of nodes' binary and weighted degrees. First, we asked whether the prevalence of certain predictors varied with age. For each region, we identified the predictor that best explained its regional pattern of FC and, for each subject, calculated the fraction of regions best explained by each factor. We then grouped subjects into percentile-based age bins (10 bins in the main text; see Fig. S5 for reproducibility of results with different numbers of bins), and found that eight predictors from four different families varied significantly across the lifespan. These included

binary and weighted flow graphs, binary and weighted mean first passage time, weighted path transitivity, and weighted path length (Fig. 4c). Notably, when we calculated the maximum variance explained at each region, we found a pattern that was highly correlated with that of the HCP dataset ( $r = 0.73$ ; Fig. 4d).

Next, we asked whether the maximum variance explained by any predictor – a measure of structure-function coupling – varied with age. We found a hemispherically symmetric (Fig. 4e) correlation pattern in which most regions, mirroring the global pattern, decreased with age. Interestingly, the spatial pattern of correlations was system-specific, with negative correlations significantly concentrated within somatomotor and visual systems (Fig. 4f). Interestingly, the relationship between variance explained and its correlation with age was negative, so that regions with high levels of structure-function coupling in normative adults were more likely to decrease with age (Fig. 4g). Note that we also found system-specific correlations of  $R^2$  with measures of intelligence, although these values were overall much weaker in magnitude (see Fig. S6).

Collectively, these results suggest that the interrelationship of structural and functional connectivity covaries weakens with age. Notably, the areas that exhibit the greatest reductions include sensorimotor systems, which are among those with the strongest coupling to begin with. Heteromodal systems, like default mode and control networks, on the other hand, exhibit subtle reductions in coupling magnitude and, in some cases, even increase with age. Our findings point to heterogeneous changes in the complex relationship between the

brain’s physical wiring and its intrinsic functional organization.

## DISCUSSION

Here, we aimed to address two questions about structure-function coupling in brain networks. What structurally-derived measure does the best job predicting FC? Second, how does the best measure vary locally, from one region to another? As a final application, we considered how the optimal predictor varies with biological age in a large lifespan dataset. We found that predictions of whole-brain FC were poor, irrespective of predictor, and could be improved upon by making predictions at a local, i.e. regional level. At this scale, the optimal predictor varied by region, with Euclidean distance and weighted mean first passage time among the best. Consistent with previous reports, the spatial patterning of structure-function coupling favored sensorimotor cortices. We then explored synergies between predictors and their inclusion in multi-linear models. Again, we found that Euclidean distance and weighted mean first passage time, along with measures of communicability and, in some instances, search information and path transitivity, exhibited strong synergistic relationships such that their joint inclusion in a model tended to support improvements in functional variance explained. Finally, we examined structure-function coupling across the human lifespan. We found that, globally, the magnitude of coupling decreased with age, an observation driven by decreases in local coupling of visual and somatomotor systems. Structure-function coupling in higher-order cognitive systems, including the control and default mode networks, went largely unchanged with age and, in some cases, even increased.

### Communication processes and sparse-to-fully weighted transformations of SC

Many studies have attempted to link patterns of structural and functional connectivity to one another. At one extreme are studies that investigated neurobiologically realistic models, e.g. neural mass models (NMMs), whose parameters correspond to biophysical constants and generate time-varying voltage traces from neuronal populations [7, 17, 48–50]. These models offer a mechanistic description of how structural links constrain brain dynamics and give rise to cohesive and correlated activity. The performance of neural mass models can be improved upon by allowing for regional heterogeneity in parameters, matching additional features of empirical brain activity, including separation of dynamic timescales and the patterning of time-varying connectivity [51, 52]. However, NMMs come at a high computational cost, limiting the possibility of performing exhaustive parameter searches or fitting the complete set of parameters at a subject-level.

At the other extreme are studies that link structure to function by directly comparing the weights of connections. In one of the earliest studies of the human connectome, the authors showed that structural weights (estimated as a length and volume normalized streamline count) and their corresponding functional connections are correlated, both globally and for select seed regions [2]. Similarly, [53] demonstrated that coherent patterns of spontaneous and task-evoked activity in the macaque oculomotor system are supported by anatomical connections. These types of correlative relationships are found at other spatial scales using invasive reconstruction and imaging techniques applied to model organisms. For instance, in [54], the authors used “barcoding” to reconstruct cellular-level synaptic connectivity and linked connection weights to the correlation structure of spontaneous activity recorded using widefield fluorescence imaging. Broadly, these approaches demonstrate that, for structurally connected neural elements, their anatomical connection weight is correlated with the similarity of their recorded activity. This approach for studying structure-function relationships, however, is limited in that comparisons between connection weights can only be carried out for directly connected pairs of neural elements. If two cells, populations, or regions are not directly connected, then it becomes impossible to make a prediction about its functional coupling.

The results reported here are situated between these two extremes and adopt useful principals from each while avoiding some of the pitfalls [12]. Specifically, we focus on predicting the weights of functional connections by transforming the sparse SC matrix into a fully-weighted (and possibly signed) matrix. Some of these transformations incorporate elements of dynamics. Flow graphs, for example, embed the probabilistic flow of random walkers between two nodes into the edges of a graph [38]. Other transformations embody communication policies that the brain could conceivably implement as means of transmitting a signal/information from one region to another. Shortest paths are an example of a centralized communication process, in that to take advantage of these paths would require global knowledge (a centralized pool of information) of the network’s shortest path structure. In contrast, decentralized processes like diffusion/random walks or navigation evolve without the need for any additional information [11, 43]. Path transitivity and search information blend these two concepts, treating shortest paths as fixed constructs, but asking how easily they could be traversed passively by a knowledgeless random walker. Other transformations represent geometric relationships between nodes or the topological similarity of their structural fingerprints.

Practically, using matrix-based predictors to explain FC has many advantages. Unlike biophysical models, all of the predictors studied here can be generated in seconds of computation time, reducing the computational burden associated with realistic models. However, this improvement in computational complexity does not re-



quire that we jettison all information about dynamics; as noted earlier, many of the matrices provide summary information about dynamical processes. This approach also circumvents the issue of missing connections. Unlike correlative methods that can only compute the similarity of existing structural and functional connections, this approach transforms the sparse structural matrix into a fully-weighted matrix, where every entry can be, in principle, non-zero. This allows for a more direct comparison. Lastly, previous studies of identical datasets have shown that the matrix predictors tend to outperform even biophysical models in terms of matching empirical patterns of FC [8, 11].

Of course, there are serious tradeoffs associated with modeling FC in terms of matrix-based predictors derived from SC. Namely, it sacrifices the neurobiological plausibility of NMMs for computational ease and the interpretability of direct structure/function correlations in order to generate fully-weighted matrices.

### Shortest paths or diffusion; centralized or decentralized processes?

Path-based metrics are often used as markers to compare populations of individuals in an effort to distinguish clinical subjects from controls [55] or to be linked with a continuous measure, e.g. intelligence scores [56]. These metrics include the well-known characteristic path length – the mean number of steps in shortest paths over all pairs of nodes – and efficiency, the mean reciprocal of the shortest path lengths [57].

Although these measures are commonplace in network neuroscience, they implicitly prioritize shortest paths as the communication routes between brain regions. Although superficially this seems like a reasonable assumption, other studies have cast doubt on these findings, noting that the backbone of shortest paths involves only small fraction of network edges [21, 58] and that, for a brain to use shortest paths for communication, requires that it has global knowledge of its shortest path structure [11, 22], which is not obviously biologically plausible.

Recently, however, a growing number of studies have presented alternative and decentralized communication models. These include models of diffusion and random walk dynamics [50, 59], epidemic spread [21, 60], more complicated models that allow for an interpolation between centralized and decentralized processes [22], and navigation models [39, 61]. Unlike shortest paths, these communication processes evolve using local knowledge – the next step depends on the weights of edges (random walks) or the distance of directly connected neighbor from the eventual target.

Here, and in agreement with other studies [11], we find that shortest paths structure (both binary and weighted) do a poor job in recapitulating patterns of FC. In contrast, measures like mean first passage time, communicability (which emphasizes not just the single shortest

path in a network, but *all* walks of *all* lengths), and others derived from navigation appear near the top of the list in terms of frequency. Although these observations do not conclusively demonstrate that shortest path structure plays no role in communication processes, they do support the hypothesis that decentralized measures may play an outsized (and possibly underappreciated) role in shaping interregional communication processes. We note, however, that under certain circumstances, e.g. biased random walks or navigation strategies [39], may access a network's shortest paths.

### The impact of space on structure-function coupling

One of the long-standing observations about brain networks is that their architecture is shaped, in part, by the space in which they are embedded [62]. The tight statistical relationship between distance and presence/absence of structural connections and their weights holds at virtually all scales [58], from cellular-level connectomes [63], to areal maps [64], to non-invasive imaging with MRI [65]. This relationship also holds for functional imaging data [66], although the coupling between space and FC is statistically less severe [67, 68].

The observation that SC and FC are both constrained by space has led to speculation that at least some fraction of variance in structure-function coupling can be attributed to their joint embedding in Euclidean space. Indeed, previous studies have shown that structure-function correlations are attenuated after regressing out the effects of Euclidean distance [11, 23], though the resulting correlations suggest that there remains some residual relationship.

Here, we adopted a local perspective on structure-function relationships and directly compared different predictors with one another. This allows us to test the extent to which Euclidean distance outperformed any of the other network measures for predicting FC. Indeed, we found that Euclidean distance was always among the best measures. This was true for predicting FC globally in both the HCP and NKI datasets, as well as the analysis of local connectivity. However, our local analysis revealed that, for many regions, especially those in control, somatomotor, and temporoparietal networks, Euclidean distance was outperformed by other measures. On the other hand, Euclidean distance was overexpressed as an optimal predictor within the visual, salience/ventral attention, and dorsal attention networks.

These observations suggest that the impact of spatial relationships on SC and FC and their statistical coupling to one another is heterogeneous and, to some extent, system-specific.

## Changes in structure-function coupling with age

The progression through development, maturation, and senescence is one of the most profound and shared human experiences. It is accompanied by increased diffusivity of task-evoked brain activity [69] and reductions in system segregation [32, 33]. Similar changes occur structurally, with reductions in modularity [70] and increased characteristic path length [29]. Less is known about how structural and function changes occur in parallel, and especially at the local scale [27].

Here, we investigate lifespan changes in structure-function coupling, and find that with age, the global correlation is reduced. At the local scale, these changes are paralleled by reductions in several predictors, notably weighted mean first passage time (the other predictors that exhibit lifespan changes do so at a much slower rate). Mean first passage time refers to the number of steps in a random walk when a random walker starting at node  $i$  is likely to have visited node  $j$ . Importantly, mean first passage time is a descriptor for a diffusive (random walk) process. The same is true for flow graphs and path transitivity, which vary systematically with age, albeit weakly. These observations suggest that, decentralized patterns of interregional communication may degrade over the human lifespan, prompting a decoupling of functional connectivity from structure.

## Future directions and limitations

This study suffers from a number of limitations. Streamline tractography provides an estimation of the underlying white matter that is potentially hampered by biases involving complex fiber geometry and limitations given the inverse problem that the methodology aims to solve [71]. For instance, our current study focuses on cortico-cortical pathways, excluding subcortical nuclei and the cerebellum from analysis. While the justification for this exclusion is straightforward – limitations of whole-brain diffusion imaging and tractography make it challenging to accurately resolve the connections of small structures in the basal ganglia [72, 73] – it nonetheless leaves open the possibility that our results will change with the inclusion of these structures. Future studies should examine whole-brain communication processes and include structures from the subcortex and cerebellum [74].

Another potential limitation concerns the breadth of matrix-wide predictors. Here, we examine 40 predictors, each of which represent a dynamical, topological, or geometric factor that could explain patterns of FC. However, there are other predictors that could, in principle, be explored here but due to the scope of the paper are not. In addition, there are other methods, including spectral decompositions [75], deep learning [76], and embedding models [77, 78], that can lead to high levels of structure-function coupling, but present little mechanis-

tic insight. Future studies should investigate alternative predictors and other methods in greater detail, seeking to merge machine-learning and neurobiological accounts of structure-function coupling.

## MATERIALS AND METHODS

### Datasets

#### *Human Connectome Project*

The Human Connectome Project (HCP) dataset [35] consisted of structural magnetic resonance imaging (T1w), resting state functional magnetic resonance imaging (fMRI) data, as well as diffusion magnetic resonance imaging data (dMRI) from 100 unrelated adult subjects. These subjects were selected as they comprised the “100 Unrelated Subjects” released by the Human Connectome Project. After excluding subjects based on data completeness and quality control (see **Quality Control**), the final subset utilized included 95 subjects (56% female, mean age =  $29.29 \pm 3.66$ , age range = 22-36). The study was approved by the Washington University Institutional Review Board and informed consent was obtained from all subjects. A comprehensive description of the imaging parameters and image preprocessing can be found in [79]. Images were collected on a 3T Siemens Connectome Skyra with a 32-channel head coil. Subjects underwent two T1-weighted structural scans, which were averaged for each subject (TR = 2400 ms, TE = 2.14 ms, flip angle =  $8^\circ$ , 0.7 mm isotropic voxel resolution). Subjects underwent four resting state fMRI scans over a two-day span. The fMRI data was acquired with a gradient-echo planar imaging sequence (TR = 720 ms, TE = 33.1 ms, flip angle =  $52^\circ$ , 2 mm isotropic voxel resolution, multi-band factor = 8). Each resting state run duration was 14:33 min, with eyes open and instructions to fixate on a cross. Finally, subjects underwent two diffusion MRI scans, which were acquired with a spin-echo planar imaging sequence (TR = 5520 ms, TE = 89.5 ms, flip angle =  $78^\circ$ , 1.25 mm isotropic voxel resolution, b-values = 1000, 2000, 3000  $s/mm^2$ , 90 diffusion weighted volumes for each shell, 18 b = 0 volumes). These two scans were taken with opposite phase encoding directions and averaged.

#### *Nathan Kline Institute, Rockland Sample*

The Nathan Kline Institute Rockland Sample (NKI) dataset consisted of structural magnetic resonance imaging, resting state functional magnetic resonance imaging data, as well as diffusion magnetic resonance imaging data from 811 subjects (downloaded December 2016 from the INDI S3 Bucket) of a community sample of participants across the lifespan. After excluding subjects based on data and metadata completeness and quality control (see **Quality Control**), the final subset utilized included

542 subjects (56% female, age range = 7-84). The study was approved by the Nathan Kline Institute Institutional Review Board and Montclair State University Institutional Review Board and informed consent was obtained from all subjects. A comprehensive description of the imaging parameters can be found online at the NKI website. Briefly, images were collected on a Siemens Magnetom Trio with a 12-channel head coil. Subjects underwent one T1-weighted structural scan (TR = 1900 ms, TE = 2.52 ms, flip angle = 9°, 1 mm isotropic voxel resolution). Subjects underwent three differently parameterized resting state scans, but only one acquisition is used in the present study. The fMRI data was acquired with a gradient-echo planar imaging sequence (TR = 645 ms, TE = 30 ms, flip angle = 60°, 3 mm isotropic voxel resolution, multiband factor = 4). This resting state run lasted approximately 9:41 seconds, with eyes open and instructions to fixate on a cross. Subjects underwent one diffusion MRI scan (TR = 2400 ms, TE = 85 ms, flip angle = 90°, 2 mm isotropic voxel resolution, 128 diffusion weighted volumes, b-value = 1500 s/mm<sup>2</sup>, 9 b = 0 volumes).

### Quality Control

For HCP, all preprocessed time series were visually inspected from visual artifact. Subject motion measurements during the fMRI and DWI scanning sessions were obtained from the HCP minimal preprocessing pipeline output directories (files: `Movement_RelativeRMS.txt` and `eddy_unwarped_images.eddy_movement_rms`). Across fMRI sessions and the single fMRI session, the mean and mean absolute deviation of the motion measurements were calculated, resulting in four summary motion measures per subject. Subjects exceeding 1.5 times the inter-quartile range (in the adverse direction) of the measurement distribution for more than one of these summary motion measurements were excluded. This resulted in the exclusion of four subjects. One additional subject was excluded due to software error during DWI processing.

The NKI was downloaded in December of 2016 from the INDI S3 Bucket. At the time of download, the dataset consisted of 957 T1w (811 subjects), 914 DWI (771 subjects), and 718 fMRI (“acquisition645”; 634 subjects) images. T1w and DWI images, and tractography results were first filtered based on visual inspection. T1w images were filtered based on artifact, such as ringing or ghosting (43 images) and for FreeSurfer reconstruction failure (105 images) as assessed with the ENIGMA QC tools, leaving 809 T1w images (699 subjects). DWI images were filtered based on corrupt data (13 images) and artifact on fitted fractional anisotropy maps (18 images), leaving 883 images (747 subjects). Tractography was run on 781 images (677 subjects) that had both quality controlled T1w and DWI images. Tractography results were filtered based on artifact, which include failure to resolve

callosal, cingulum, and/or corticospinal streamlines or errors resulting in visually sparse streamline densities, resulting in 764 tractography runs (661 subjects). T1w, DWI, and fMRI images were then filtered using computed image quality metrics [80–82]. T1w images were excluded if the scan was marked as an outlier (1.5x the inter-quartile range in the adverse direction) in three or more of following quality metric distributions: coefficient of joint variation, contrast-to-noise ratio, signal-to-noise ratio, Dietrich’s SNR, FBER, and EFC. DWI images were excluded if the percent of signal outliers, determined by `eddy_qc`, was greater than 15%. Furthermore, DWI were excluded if the scan was marked as an outlier (1.5x the inter-quartile range in the adverse direction) in two or more of following quality metric distributions: temporal signal-to-noise ratio, mean voxel intensity outlier count, or max voxel intensity outlier count. fMRI images were excluded if greater than 15% of time frames exceeded 0.5mm framewise displacement. Furthermore, fMRI images were excluded the scan was marked as an outlier (1.5x the inter-quartile range in the adverse direction) in 3 or more of the following quality metric distributions: DVARS standard deviation, DVARS voxel-wise standard deviation, temporal signal-to-noise ratio, framewise displacement mean, AFNI’s outlier ratio, and AFNI’s quality index. This image quality metric filtering excluded zero T1w images, 16 DWI images, and 21 fMRI images. Following this visual and image quality metric filtering, 809 T1w images (699 subjects), 728 DWI images (619 subjects), and 697 fMRI images (633 subjects). The intersection of subjects with at least one valid T1w, DWI, and fMRI images totaled 567 subjects. Finally, age metadata was available for 542 of these subjects.

### Image Processing

Structural, functional, and diffusion images of the HCP dataset were minimally preprocessed according to the description provided in [79]. Briefly, T1w images were aligned to MNI space before undergoing FreeSurfer’s (version 5.3) cortical reconstruction workflow. fMRI images were corrected for gradient distortion, susceptibility distortion, and motion, and then aligned to the corresponding T1w with one spline interpolation step. This volume was further corrected for intensity bias and normalized to a mean of 10000. This volume was then projected to the *32k\_fs\_LR* mesh, excluding outliers, and aligned to a common space using a multi-modal surface registration [83]. The resultant CIFTI file for each HCP subject used in this study followed the file naming pattern: `*_REST{1,2}_{LR,RL}_Atlas_MSMAll.dtseries.nii`. DWI images were normalized to the mean b0 image, corrected for EPI, eddy current, and gradient non-linearity distortions, and motion, and aligned to subject anatomical space using a boundary-based registration [84]. In addition to HCP’s minimal preprocessing, diffu-

sion images were corrected for intensity non-uniformity with `N4BiasFieldCorrection` [85]. FSL's `dtifit` was used to obtain scalar maps of fractional anisotropy, mean diffusivity, and mean kurtosis. The Dipy toolbox (version 1.1) [86] was used to fit a multi-shell multi-tissue constrained spherical deconvolution [87] to the diffusion data with a spherical harmonics order of 8, using tissue maps estimated with FSL's `fast` [88]. Tractography was performed using Dipy's `Local Tracking` module [86]. Multiple instances of probabilistic tractography were run per subject [89], varying the step size and maximum turning angle of the algorithm. Tractography was run at step sizes of 0.25 mm, 0.4 mm, 0.5 mm, 0.6 mm, and 0.75 mm with the maximum turning angle set to 20°. Additionally, tractography was run at maximum turning angles of 10°, 16°, 24°, and 30° with the step size set to 0.5 mm. For each instance of tractography, streamlines were randomly seeded three times within each voxel of a white matter mask, retained if longer than 10 mm and with valid endpoints, following Dipy's implementation of anatomically constrained tractography [90], and errant streamlines were filtered based on the cluster confidence index [91].

For NKI, T1w images were submitted to FreeSurfer's cortical reconstruction workflow (version 6.0). The FreeSurfer results were used to skull strip the T1w, which was subsequently aligned to MNI space with 6 degrees of freedom. fMRI preprocessing was performed using the fMRIPrep version 1.1.8 [13]. The following description of fMRI preprocessing is based on fMRIPrep's documentation. This workflow utilizes ANTs (2.1.0), FSL (5.0.9), AFNI (16.2.07), FreeSurfer (6.0.1), nipyne [92], and Nilearn [93]. Each T1w was corrected using `N4BiasFieldCorrection` [85] and skull-stripped using `antsBrainExtraction.sh` (using the OASIS template). The ANTs derived brain mask was refined with a custom variation of the method to reconcile ANTs-derived and FreeSurfer-derived segmentations of the cortical gray-matter of Mindboggle [94]. Brain tissue segmentation of cerebrospinal fluid (CSF), white-matter (WM) and gray-matter (GM) was performed on the brain-extracted T1w using `fast` [88]. Functional data was slice time corrected using `3dTshift` from AFNI and motion corrected using FSL's `mcflirt`. "Fieldmap-less" distortion correction was performed by co-registering the functional image to the same-subject T1w with intensity inverted [95] constrained with an average fieldmap template [96], implemented with `antsRegistration`. This was followed by co-registration to the corresponding T1w using boundary-based registration [84] with 9 degrees of freedom, using `bbregister`. Motion correcting transformations, field distortion correcting warp, and BOLD-to-T1w transformation warp were concatenated and applied in a single step using `antsApplyTransforms` using Lanczos interpolation. Frame-wise displacement [97] was calculated for each functional run using the implementation of Nipyne. The first four frames of the BOLD data in the T1w space were discarded. Diffusion images were

preprocessed following the "DESIGNER" pipeline using MRTrix (3.0) [98, 99], which includes denoising, Gibbs ringing and Rician bias correction, distortion and eddy current correction [100] and B1 field correction. DWI were then aligned to their corresponding T1w and the MNI space in one interpolation step with B-vectors rotated accordingly. Local models of white matter orientation were estimated in a recursive manner [101] using constrained spherical deconvolution [87] with a spherical harmonics order of 8. Tractography was performed using Dipy's `Local Tracking` module [86]. Probabilistic streamline tractography was seeded five times in each white matter voxel. Streamlines were propagated with a 0.5 mm step size and a maximum turning angle set to 20°. Streamlines were retained if longer than 10 mm and with valid endpoints, following Dipy's implementation of anatomically constrained tractography [90]

## Network definition

### Parcellation

As HCP fMRI was provided in *32k\_fs\_LR* space, this data could be parcellated based on the available Schaefer 400 parcellation [37] in the CIFTI file format. For HCP DWI and NKI fMRI and DWI, the Schaefer 400 parcellation was rendered as a volumetric parcellation in each subject's anatomical space within the grey matter ribbon. To transfer the parcellation from *fsaverage* to *subject* space, FreeSurfer's `mrisc_label` function was used in conjunction with a pre-trained Gaussian classifier surface atlas [102] to register cortical surfaces based on individual curvature and sulcal patterns.

### Structural Connectivity

For HCP, for each tractography instance, streamline counts were normalized by dividing the count between nodes by the geometric average volume of the nodes. Since tractography was run nine times per subject, edge values were collapsed across runs. To do this, the weighted mean was taken with weights based on the proportion of total streamlines at that edge. This amounts to calculating the expected value, where probabilities are based on the proportion of total edge weight across tractography instances. This operation biases edge weights towards larger values, which reflect tractography instances better parameterized to estimate the geometry of each connection. For NKI, streamline counts were normalized by dividing the count between nodes by the geometric average volume of the nodes.

## Functional Connectivity

For HCP and NKI, each preprocessed BOLD image was linearly detrended, band-pass filtered (0.008-0.08 Hz), confound regressed and standardized using Nilearn's `signal.clean` function, which removes confounds orthogonally to the temporal filters. The confound regression strategy included six motion estimates, mean signal from a white matter, cerebrospinal fluid, and whole brain mask, derivatives of these previous nine regressors, and squares of these 18 terms. Spike regressors were not applied to the HCP data. Spike regressors for frames with motion greater than 0.5 mm framewise displacement were applied to the NKI data. The 36 parameter strategy (with and without spike regression) has been shown to be a relatively effective option to reduce motion-related artifacts [103]. Following these preprocessing operations, the mean signal was taken at each node, in either the surface space (HCP) or volumetric anatomical space (NKI).

### Predictors

#### Flow graphs

A flow graph is a transformation of a network's (possibly sparse) connectivity matrix,  $A_{ij}$ , into a fully-weighted matrix in which the dynamics of a Markov process are embedded into edge weights [38]. Flow graphs have been applied in neuroscience for the purposes of community detection [104]. For a continuous time random walk with dynamics  $\dot{p}_i = -\sum_j L_{ij}p_j$ , the corresponding flow graph is given by  $A'(t)_{ij} = (e^{-tL})_{ij}s_j$ . In these expressions, the matrix  $L$  is the normalized Laplacian whose elements are given by  $L_{ij} = D - A/s$ , where  $s_i = \sum_j A_{ij}$  is a node's degree or weighted degree and  $D$  is the degree diagonal matrix (a square matrix the elements of  $s$  along its diagonal). The variable  $p_i$  represents the probability of finding a random walker on vertex  $i$ .

The element  $A'(t)_{ij}$  represents the probabilistic flow of random walkers between nodes  $i$  and  $j$  at time  $t$ . Here, we generated flow graphs using both binary and weighted structural connectivity matrices at evaluated times at different Markov times,  $t$ . Specifically, we focused on  $t = 1, 2.5, 5$ , and  $10$ . We refer to these variables as *fgbin*- or *fgwei*- followed by *Markov time*,  $t$ .

#### Navigation

The aim of many networks is to move something from one point in the network to another in as few steps as possible, i.e. to take advantage of shortest paths. However, doing so requires full knowledge of a network's shortest path structure, which may not be a realistic assumption, especially for naturally-occurring biological systems like brains. However, it may be the case

that simple routing strategies – rules or heuristics for how to move from one node to another – can sometimes uncover optimal or near-optimal shortest paths. One such routing rule is, given a target node  $T$ , to always move towards the node nearest the target in some metric space, e.g. Euclidean space.

Recently, this navigation approach was applied to brain networks [39]. This study defined two novel measures based on navigation of connectome data. First, they defined the number of hops in the shortest path uncovered by the navigation process. We refer to this variable as *nav-num*. Note that for some node pairs, the navigation procedure leads to a dead end or a cycle – in which case the number of hops is listed as  $\infty$ . For the completed paths, the authors also defined their total length in metric space (in this case Euclidean distance). We refer to this variable as *nav-ms* and, like *nav-num*, impute incomplete paths with values of  $\infty$ .

#### Communicability

Communicability [40] is a weighted sum of walks of all lengths between pairs of nodes. For a binary network, it is calculated as  $G = e^A$  or  $\sum_{p=0}^{\infty} \frac{A^p}{p!}$ . The contribution of direct links (1-step walks) is  $\frac{A^1}{1!}$ , two-step walks is  $\frac{A^2}{2!}$ , three-step is  $\frac{A^3}{3!}$ , and so on. In other words, longer walks have larger denominators and, effectively, are penalized more severely. We denote this measure as *comm-bin*.

For weighted networks, we follow [41] and first normalize the weighted connectivity matrix as  $A' = D^{-1/2}AD^{-1/2}$  where  $D$  is the degree diagonal matrix. As before, this normalized matrix is exponentiated to calculate the weighted communicability  $G_{wei} = e^{A'}$ . We denote this measure as *comm-wei*.

#### Matching Index

The matching index [42] is a measure of overlap between pairs of nodes based on their connectivity profiles. Suppose  $\Gamma_i = \{j : A_{ij} > 0\}$  is the set of all nodes directly connected to node  $i$ . We can calculate the matching index between nodes  $i$  and  $j$  as  $M_{ij} = \frac{|\Gamma_{i \setminus j} \cap \Gamma_{j \setminus i}|}{|\Gamma_{i \setminus j} \cup \Gamma_{j \setminus i}|}$ . Here,  $\Gamma_{i \setminus j}$  refers to the neighbors of node  $i$  excluding node  $j$ .

#### Shortest paths

In a network, each edge can be associated with a cost. For binary networks, the cost is identical for each edge; for weighted networks the cost can be obtained by a monotonic transformation of edges' weights to length, e.g. by raising an edge's weight to a negative power. The shortest path between a source node,  $s$ , and a target node,  $t$ , is the sequence of edges  $\pi_{s \rightarrow t} =$

$\{A_{si}, A_{ij}, \dots, A_{kt}\}$  that minimizes the sum  $C_{si} + C_{ij} + \dots + C_{kt}$ , where  $C_{si}$  is the cost of traversing the edge linking nodes  $s$  and  $i$ .

Here, we calculated shortest paths matrices for the binary network (where the cost is identical for all existing edges) and also for a parameterized affinity-to-cost transformation evaluated at several different parameter values. Specifically, we used the following transformation:  $C_{ij} = A_{ij}^{-\gamma}$ . We focused on the parameter values  $\gamma = 0.125, 0.25, 0.5, 1.0, 2.0$ , and  $4.0$ . We refer to these measures as *pl-bin* and *pl-wei*- followed by  $\gamma$  value.

### Cosine Similarity

The cosine similarity measures the angle between two vectors,  $x = [x_1, \dots, x_P]$ , and  $y = [y_1, \dots, y_P]$ . Specifically, it measures  $S_{xy} = \frac{x \cdot y}{\|x\| \|y\|}$ . Here, we treated regions' connectivity profiles (the row of the connectivity matrix) as vectors and computed the similarity between all pairs of regions. We repeated this procedure for both the binary (*cos-bin*) and we weighted (*cos-wei*) connectivity matrices.

### Search Information

Search information measures the amount of information (in bits) required to traverse shortest paths in a network [11, 43]. If the shortest path between nodes  $s$  and  $t$  is given by  $\pi_{s \rightarrow t} = \{s, i, j, \dots, k, l, t\}$ , then the probability of taking that path is given by:  $P(\pi_{s \rightarrow t}) = p_{si} \times p_{ij} \times \dots \times p_{kl} \times p_{lt}$ , where  $p_{ij} = \frac{A_{ij}}{\sum_j A_{ij}}$ . The information required to take this path, then, is  $S(\pi_{s \rightarrow t}) = \log_2[P(\pi_{s \rightarrow t})]$ .

Here, we calculated search information based on binary shortest paths (*si-bin*) and based on shortest paths obtained from each of the weight-to-cost transformations (*si-wei- $\gamma$  value*).

### Mean First Passage Time

The mean first passage time (MFPT) refers to the expected number of steps a random walk must evolve for a random walker starting at node  $i$  to end up at node  $j$  [44, 105]. Here, we expressed the columns as z-scores to remove nodal (column) biases and analyzed the resulting matrices for the binary (*mfpt-bin*) and weighted (*mfpt-wei*) connectivity matrices.

### Euclidean Distance

The final predictor that we considered was the Euclidean distance between regional centers of mass (*eucl*).

## Core-periphery analysis

We used a core-periphery model to analyze the count matrix of how often pairs of predictors were included together in the same multi-linear model. In this context, a *core* refers to a group of predictor that are densely internally connected and to a *periphery*, that connect to the core but not to other peripheral predictors [106]. To identify core-periphery structure, we used a variant of a common core-periphery definition in which the transition from core to periphery varies smoothly. Rather than using a binary assignment of nodes to a core or a periphery, this allows nodes to have a graded and continuous assignments. We begin by defining the  $N \times 1$  vector  $C_i$  of non-negative elements [107]. Given this vector, we then defined the matrix  $C_{ij} = C_i C_j$  subject to the constraint that  $\sum_{ij} C_{ij} = 1$ . The values in the vector  $C$  are permutations of the vector:

$$C_m^* = \frac{1}{1 + \exp(-(m - \beta N) \times \tan(\pi\alpha/2))}. \quad (1)$$

The coreness of each node is the permutation of  $C_m^*$  that maximizes the core quality function:

$$R = \sum_{ij} G_{ij} C_i C_j. \quad (2)$$

This method introduces two free parameters,  $\alpha \in [0, 1]$  and  $\beta \in [0, 1]$ . The value of  $\alpha$  determines the sharpness of the core-periphery boundary. With  $\alpha = 1$ , the transition is binary while the transition with  $\alpha = 0$  is maximally fuzzy. Similarly, the value of  $\beta$  determines the size of the core; as  $\beta$  ranges from 0 to 1, the size of the core varies from  $N$  to 0. In our application, we performed a grid search of 51 logarithmically-spaced values of  $\alpha$  and  $\beta$ , using a simulated annealing algorithm to maximize  $R$  (with 25 restarts).

## Community detection

In the main text, we described an analysis in which we clustered brain regions based on the similarity of their optimal predictor. Briefly, this procedure entailed calculating for each brain region the frequency with which predictor,  $p$ , was optimal, i.e. explained the greatest amount of variance in that regions' FC pattern. This resulted in a vector  $\mathbf{h} = \{h_1, \dots, h_p, \dots, h_{40}\}$  subject to the constraint that  $\sum_p h_p = 1$ . We then computed the correlation between all pairs of brain regions based on these "fingerprints." We refer to this matrix as  $S$ , whose element  $S_{ij}$  denotes the similarity between fingerprints of regions  $i$  and  $j$ .

To better understand the structure of  $S$ , we clustered brain regions into communities using modularity maximization [5, 108, 109]. To do so, we optimized the modularity quality function:

$$Q = \sum_{ij} B_{ij} \delta(\sigma_i, \sigma_j) \quad (3)$$

where  $B_{ij} = S_{ij} - P_{ij}$ . In this expression,  $P_{ij}$  is the expected weight of the connection between regions  $i$  and  $j$ . For simplicity, we set this value equal to the average element of  $S$  and used this value for all pairs of brain regions.

We used a generalization of the Louvain algorithm [110] to optimize  $Q$ . This algorithm is non-deterministic and results in a degeneracy of near-optimal solutions. To resolve this degeneracy, we used a consensus clustering algorithm in which we ran the Louvain algorithm 1000 times (random initial conditions) and computed the co-assignment probability for all pairs of brain regions, i.e. the likelihood that they were assigned to the same community [58, 111–113]. Then, we calculated the expected probability that any two nodes were assigned to the same community after randomly and independently permuting the order of each of the 1000 partitions. From these two values, we calculated a new modularity matrix – the ob-

served co-assignment probability minus the expected – and clustered this matrix again (repeating the algorithm 1000 times). This sequence – modularity maximization followed by construction of observed and expected co-assignment probabilities – was repeated until each of the 1000 runs converged to an identical solution. At this point the consensus algorithm terminated.

## AUTHOR CONTRIBUTIONS

FZE and RFB conceived of the study, performed analyses, and generated figures. JF contributed and processed all imaging data. FZE, JF, JS, BM, and RFB wrote and edited the manuscript.

## ACKNOWLEDGMENTS

This material is based upon work supported by the National Science Foundation under Grant No. 076059-00003C (RFB; FZE).

- 
- [1] Olaf Sporns, Giulio Tononi, and Rolf Kötter, “The human connectome: a structural description of the human brain,” *PLoS Comput Biol* **1**, e42 (2005).
  - [2] Patric Hagmann, Leila Cammoun, Xavier Gigandet, Reto Meuli, Christopher J Honey, Van J Wedeen, and Olaf Sporns, “Mapping the structural core of human cerebral cortex,” *PLoS Biol* **6**, e159 (2008).
  - [3] Olaf Sporns and Jonathan D Zwi, “The small world of the cerebral cortex,” *Neuroinformatics* **2**, 145–162 (2004).
  - [4] Martijn P Van Den Heuvel and Olaf Sporns, “Rich-club organization of the human connectome,” *Journal of Neuroscience* **31**, 15775–15786 (2011).
  - [5] Olaf Sporns and Richard F Betzel, “Modular brain networks,” *Annual review of psychology* **67**, 613–640 (2016).
  - [6] Danielle S Bassett, Daniel L Greenfield, Andreas Meyer-Lindenberg, Daniel R Weinberger, Simon W Moore, and Edward T Bullmore, “Efficient physical embedding of topologically complex information processing networks in brains and computer circuits,” *PLoS comput biol* **6**, e1000748 (2010).
  - [7] Christopher J Honey, Rolf Kötter, Michael Breakspear, and Olaf Sporns, “Network structure of cerebral cortex shapes functional connectivity on multiple time scales,” *Proceedings of the National Academy of Sciences* **104**, 10240–10245 (2007).
  - [8] Christopher J Honey, Olaf Sporns, Leila Cammoun, Xavier Gigandet, Jean-Philippe Thiran, Reto Meuli, and Patric Hagmann, “Predicting human resting-state functional connectivity from structural connectivity,” *Proceedings of the National Academy of Sciences* **106**, 2035–2040 (2009).
  - [9] Ann M Hermundstad, Danielle S Bassett, Kevin S Brown, Elissa M Aminoff, David Clewett, Scott Freeman, Amy Frithsen, Arianne Johnson, Christine M Tipper, Michael B Miller, *et al.*, “Structural foundations of resting-state and task-based functional connectivity in the human brain,” *Proceedings of the National Academy of Sciences* **110**, 6169–6174 (2013).
  - [10] Maxwell H Turner, Kevin Mann, and Thomas R Clandinin, “The connectome predicts resting-state functional connectivity across the drosophila brain,” *Current Biology* (2021).
  - [11] Joaquín Goñi, Martijn P Van Den Heuvel, Andrea Avena-Koenigsberger, Nieves Velez De Mendizabal, Richard F Betzel, Alessandra Griffa, Patric Hagmann, Bernat Corominas-Murtra, Jean-Philippe Thiran, and Olaf Sporns, “Resting-brain functional connectivity predicted by analytic measures of network communication,” *Proceedings of the National Academy of Sciences* **111**, 833–838 (2014).
  - [12] Andrea Avena-Koenigsberger, Bratislav Misić, and Olaf Sporns, “Communication dynamics in complex brain networks,” *Nature Reviews Neuroscience* **19**, 17 (2018).
  - [13] Oscar Esteban, Christopher J Markiewicz, Ross W Blair, Craig A Moodie, A Ilkay Isik, Asier Erramuzpe, James D Kent, Mathias Goncalves, Elizabeth DuPre, Madeleine Snyder, *et al.*, “fmriprep: a robust preprocessing pipeline for functional mri,” *Nature methods* **16**, 111–116 (2019).
  - [14] Matthew Cieslak, Philip A Cook, Xiaosong He, Fang-Cheng Yeh, Thijs Dhollander, Azeez Adebimpe, Geoffrey K Aguirre, Danielle S Bassett, Richard F Betzel, Josiane Bourque, *et al.*, “Qsirep: An integrative platform for preprocessing and reconstructing diffusion mri,” *bioRxiv* (2020).
  - [15] Kanika Bansal, Johan Nakuci, and Sarah Feldt Muldoon, “Personalized brain network models for assess-

- ing structure–function relationships,” *Current Opinion in Neurobiology* **52**, 42–47 (2018).
- [16] Laura E Suárez, Ross D Markello, Richard F Betzel, and Bratislav Misic, “Linking structure and function in macroscale brain networks,” *Trends in Cognitive Sciences* (2020).
- [17] Yusuke Adachi, Takahiro Osada, Olaf Sporns, Takamitsu Watanabe, Teppei Matsui, Kentaro Miyamoto, and Yasushi Miyashita, “Functional connectivity between anatomically unconnected areas is shaped by collective network-level effects in the macaque cortex,” *Cerebral cortex* **22**, 1586–1592 (2012).
- [18] Paula Sanz-Leon, Stuart A Knock, Andreas Spiegler, and Viktor K Jirsa, “Mathematical framework for large-scale brain network modeling in the virtual brain,” *Neuroimage* **111**, 385–430 (2015).
- [19] Jessica S Damoiseaux and Michael D Greicius, “Greater than the sum of its parts: a review of studies combining structural connectivity and resting-state functional connectivity,” *Brain structure and function* **213**, 525–533 (2009).
- [20] Bratislav Misić, Richard F Betzel, Marcel A De Reus, Martijn P Van Den Heuvel, Marc G Berman, Anthony R McIntosh, and Olaf Sporns, “Network-level structure-function relationships in human neocortex,” *Cerebral Cortex* **26**, 3285–3296 (2016).
- [21] Bratislav Misić, Richard F Betzel, Azadeh Nematzadeh, Joaquin Goni, Alessandra Griffa, Patric Hagmann, Alessandro Flammini, Yong-Yeol Ahn, and Olaf Sporns, “Cooperative and competitive spreading dynamics on the human connectome,” *Neuron* **86**, 1518–1529 (2015).
- [22] Andrea Avena-Koenigsberger, Xiaoran Yan, Artemy Kolchinsky, Martijn van den Heuvel, Patric Hagmann, and Olaf Sporns, “A spectrum of routing strategies for brain networks,” *PLoS computational biology* **15**, e1006833 (2019).
- [23] Richard F Betzel, John D Medaglia, Ari E Kahn, Jonathan Soffer, Daniel R Schonhaut, and Danielle S Bassett, “Structural, geometric and genetic factors predict interregional brain connectivity patterns probed by electrocorticography,” *Nature biomedical engineering* **3**, 902–916 (2019).
- [24] Caio Seguin, Ye Tian, and Andrew Zalesky, “Network communication models improve the behavioral and functional predictive utility of the human structural connectome,” *Network Neuroscience* **4**, 980–1006 (2020).
- [25] Zijin Gu, Keith Wakefield Jamison, Mert Rory Sabuncu, and Amy Kuceyeski, “Regional structural-functional connectome coupling is heritable and associated with age, sex and cognition in adults,” *bioRxiv* (2020).
- [26] Alessandra Griffa, Enrico Amico, Raphael Liegeois, Dimitri Van De Ville, and Maria Giulia Preti, “Structure-function interplay as signature for brain decoding and fingerprinting,” *bioRxiv* (2021).
- [27] Graham L Baum, Zaixu Cui, David R Roalf, Rastko Ciric, Richard F Betzel, Bart Larsen, Matthew Cieslak, Philip A Cook, Cedric H Xia, Tyler M Moore, *et al.*, “Development of structure–function coupling in human brain networks during youth,” *Proceedings of the National Academy of Sciences* **117**, 771–778 (2020).
- [28] Bertha Vázquez-Rodríguez, Laura E Suárez, Ross D Markello, Golia Shafiei, Casey Paquola, Patric Hagmann, Martijn P Van Den Heuvel, Boris C Bernhardt, R Nathan Spreng, and Bratislav Misic, “Gradients of structure–function tethering across neocortex,” *Proceedings of the National Academy of Sciences* **116**, 21219–21227 (2019).
- [29] Richard F Betzel, Lisa Byrge, Ye He, Joaquín Goñi, Xi-Nian Zuo, and Olaf Sporns, “Changes in structural and functional connectivity among resting-state networks across the human lifespan,” *Neuroimage* **102**, 345–357 (2014).
- [30] Catherine Lebel, Lindsay Walker, Alexander Leemans, Linda Phillips, and Christian Beaulieu, “Microstructural maturation of the human brain from childhood to adulthood,” *Neuroimage* **40**, 1044–1055 (2008).
- [31] Joshua Faskowitz, Xiaoran Yan, Xi-Nian Zuo, and Olaf Sporns, “Weighted stochastic block models of the human connectome across the life span,” *Scientific reports* **8**, 1–16 (2018).
- [32] Linda Geerligs, Remco J Renken, Emi Saliassi, Natasha M Maurits, and Monique M Lorist, “A brain-wide study of age-related changes in functional connectivity,” *Cerebral cortex* **25**, 1987–1999 (2015).
- [33] Micaela Y Chan, Denise C Park, Neil K Savalia, Steven E Petersen, and Gagan S Wig, “Decreased segregation of brain systems across the healthy adult lifespan,” *Proceedings of the National Academy of Sciences* **111**, E4997–E5006 (2014).
- [34] Xi-Nian Zuo, Ye He, Richard F Betzel, Stan Colcombe, Olaf Sporns, and Michael P Milham, “Human connectomics across the life span,” *Trends in cognitive sciences* **21**, 32–45 (2017).
- [35] David C Van Essen, Stephen M Smith, Deanna M Barch, Timothy EJ Behrens, Essa Yacoub, Kamil Ugurbil, Wu-Minn HCP Consortium, *et al.*, “The wu-minn human connectome project: an overview,” *Neuroimage* **80**, 62–79 (2013).
- [36] Kate Brody Nooner, Stanley Colcombe, Russell Tobe, Maarten Mennes, Melissa Benedict, Alexis Moreno, Laura Panek, Shaquanna Brown, Stephen Zavitz, Qingyang Li, *et al.*, “The nki-rockland sample: a model for accelerating the pace of discovery science in psychiatry,” *Frontiers in neuroscience* **6**, 152 (2012).
- [37] Alexander Schaefer, Ru Kong, Evan M Gordon, Timothy O Laumann, Xi-Nian Zuo, Avram J Holmes, Simon B Eickhoff, and BT Thomas Yeo, “Local-global parcellation of the human cerebral cortex from intrinsic functional connectivity mri,” *Cerebral cortex* **28**, 3095–3114 (2018).
- [38] Renaud Lambiotte, Roberta Sinatra, J-C Delvenne, Tim S Evans, Mauricio Barahona, and Vito Latora, “Flow graphs: Interweaving dynamics and structure,” *Physical Review E* **84**, 017102 (2011).
- [39] Caio Seguin, Martijn P Van Den Heuvel, and Andrew Zalesky, “Navigation of brain networks,” *Proceedings of the National Academy of Sciences* **115**, 6297–6302 (2018).
- [40] Ernesto Estrada and Naomichi Hatano, “Communicability in complex networks,” *Physical Review E* **77**, 036111 (2008).
- [41] Jonathan J Crofts and Desmond J Higham, “A weighted communicability measure applied to complex brain networks,” *Journal of the Royal Society Interface* **6**, 411–



- 414 (2009).
- [42] Claus-C Hilgetag, Gully APC Burns, Marc A O'Neill, Jack W Scannell, and Malcolm P Young, "Anatomical connectivity defines the organization of clusters of cortical areas in the macaque and the cat," *Philosophical Transactions of the Royal Society of London. Series B: Biological Sciences* **355**, 91–110 (2000).
- [43] Martin Rosvall, Andreas Grönlund, Petter Minnhagen, and Kim Sneppen, "Searchability of networks," *Physical Review E* **72**, 046117 (2005).
- [44] Jae Dong Noh and Heiko Rieger, "Random walks on complex networks," *Physical review letters* **92**, 118701 (2004).
- [45] Yusuf Osmanhoğlu, Birkan Tunç, Drew Parker, Mark A Elliott, Graham L Baum, Rastko Ciric, Theodore D Satterthwaite, Raquel E Gur, Ruben C Gur, and Ragini Verma, "System-level matching of structural and functional connectomes in the human brain," *NeuroImage* **199**, 93–104 (2019).
- [46] František Váša, Jakob Seidlitz, Rafael Romero-Garcia, Kirstie J Whitaker, Gideon Rosenthal, Petra E Vértes, Maxwell Shinn, Aaron Alexander-Bloch, Peter Fonagy, Raymond J Dolan, *et al.*, "Adolescent tuning of association cortex in human structural brain networks," *Cerebral Cortex* **28**, 281–294 (2018).
- [47] Ross D Markello and Bratislav Misic, "Comparing spatial null models for brain maps," *NeuroImage*, 118052 (2021).
- [48] Mark W Woolrich and Klaas E Stephan, "Biophysical network models and the human connectome," *Neuroimage* **80**, 330–338 (2013).
- [49] Peng Wang, Ru Kong, Xiaolu Kong, Raphaël Liégeois, Csaba Orban, Gustavo Deco, Martijn P Van Den Heuvel, and BT Thomas Yeo, "Inversion of a large-scale circuit model reveals a cortical hierarchy in the dynamic resting human brain," *Science advances* **5**, eaat7854 (2019).
- [50] Arnaud Messé, David Rudrauf, Alain Giron, and Guillaume Marrelec, "Predicting functional connectivity from structural connectivity via computational models using mri: an extensive comparison study," *NeuroImage* **111**, 65–75 (2015).
- [51] Rishidev Chaudhuri, Kenneth Knoblauch, Marie-Alice Gariel, Henry Kennedy, and Xiao-Jing Wang, "A large-scale circuit mechanism for hierarchical dynamical processing in the primate cortex," *Neuron* **88**, 419–431 (2015).
- [52] Xiaolu Kong, Ru Kong, Csaba Orban, Wang Peng, Shaoshi Zhang, Kevin Anderson, Avram Holmes, John D Murray, Gustavo Deco, Martijn van den Heuvel, *et al.*, "Anatomical and functional gradients shape dynamic functional connectivity in the human brain," *bioRxiv* (2021).
- [53] Justin L Vincent, Gaurav H Patel, Michael D Fox, Abraham Z Snyder, Justin T Baker, David C Van Essen, John M Zempel, Lawrence H Snyder, Maurizio Corbetta, and Marcus E Raichle, "Intrinsic functional architecture in the anaesthetized monkey brain," *Nature* **447**, 83–86 (2007).
- [54] Longwen Huang, Justus M Kechschull, Daniel Fürth, Simon Musall, Matthew T Kaufman, Anne K Churchland, and Anthony M Zador, "Bricseq bridges brain-wide interregional connectivity to neural activity and gene expression in single animals," *Cell* **182**, 177–188 (2020).
- [55] Aaron F Alexander-Bloch, Petra E Vértes, Reva Stidd, François Lalonde, Liv Clasen, Judith Rapoport, Jay Giedd, Edward T Bullmore, and Nitin Gogtay, "The anatomical distance of functional connections predicts brain network topology in health and schizophrenia," *Cerebral cortex* **23**, 127–138 (2013).
- [56] Martijn P Van Den Heuvel, Cornelis J Stam, René S Kahn, and Hilleke E Hulshoff Pol, "Efficiency of functional brain networks and intellectual performance," *Journal of Neuroscience* **29**, 7619–7624 (2009).
- [57] Vito Latora and Massimo Marchiori, "Efficient behavior of small-world networks," *Physical review letters* **87**, 198701 (2001).
- [58] Richard F Betzel and Danielle S Bassett, "Specificity and robustness of long-distance connections in weighted, interareal connectomes," *Proceedings of the National Academy of Sciences* **115**, E4880–E4889 (2018).
- [59] Ashish Raj and Fon Powell, "Models of network spread and network degeneration in brain disorders," *Biological Psychiatry: Cognitive Neuroscience and Neuroimaging* **3**, 788–797 (2018).
- [60] Ying-Qiu Zheng, Yu Zhang, Yvonne Yau, Yashar Zeighami, Kevin Larcher, Bratislav Misic, and Alain Dagher, "Local vulnerability and global connectivity jointly shape neurodegenerative disease propagation," *PLoS biology* **17**, e3000495 (2019).
- [61] Antoine Allard and M Ángeles Serrano, "Navigable maps of structural brain networks across species," *PLoS computational biology* **16**, e1007584 (2020).
- [62] Jennifer Stiso and Danielle S Bassett, "Spatial embedding imposes constraints on neuronal network architectures," *Trends in cognitive sciences* **22**, 1127–1142 (2018).
- [63] Marta Rivera-Alba, Shiv N Vitaladevuni, Yuriy Mishchenko, Zhiyuan Lu, Shin-ya Takemura, Lou Schaffer, Ian A Meinertzhagen, Dmitri B Chklovskii, and Gonzalo G de Polavieja, "Wiring economy and volume exclusion determine neuronal placement in the drosophila brain," *Current Biology* **21**, 2000–2005 (2011).
- [64] Mária Ercsey-Ravasz, Nikola T Markov, Camille Lamy, David C Van Essen, Kenneth Knoblauch, Zoltán Toroczkai, and Henry Kennedy, "A predictive network model of cerebral cortical connectivity based on a distance rule," *Neuron* **80**, 184–197 (2013).
- [65] David Samu, Anil K Seth, and Thomas Nowotny, "Influence of wiring cost on the large-scale architecture of human cortical connectivity," *PLoS Comput Biol* **10**, e1003557 (2014).
- [66] Farnaz Zamani Esfahlani, Maxwell A Bertolero, Danielle S Bassett, and Richard F Betzel, "Space-independent community and hub structure of functional brain networks," *NeuroImage* **211**, 116612 (2020).
- [67] Sabine Oligschläger, Julia M Huntentburg, Johannes Golchert, Mark E Lauckner, Tyler Bonnen, and Daniel S Margulies, "Gradients of connectivity distance are anchored in primary cortex," *Brain Structure and Function* **222**, 2173–2182 (2017).
- [68] Sabine Oligschläger, Ting Xu, Blazej M Baczkowski, Marcel Falkiewicz, Arnaud Falchier, Gary Linn, and Daniel S Margulies, "Gradients of connectivity distance in the cerebral cortex of the macaque monkey," *Brain Structure and Function* **224**, 925–935 (2019).

- [69] Roberto Cabeza, Nicole D Anderson, Jill K Locantore, and Anthony R McIntosh, "Aging gracefully: compensatory brain activity in high-performing older adults," *Neuroimage* **17**, 1394–1402 (2002).
- [70] Maria Grazia Puxeddu, Joshua Faskowitz, Richard F Betzel, Manuela Petti, Laura Astolfi, and Olaf Sporns, "The modular organization of brain cortical connectivity across the human lifespan," *NeuroImage* **218**, 116974 (2020).
- [71] Francois Rheault, Philippe Poulin, Alex Valcourt Caron, Etienne St-Onge, and Maxime Descoteaux, "Common misconceptions, hidden biases and modern challenges of dmri tractography," *Journal of neural engineering* **17**, 011001 (2020).
- [72] Cibu Thomas, Q Ye Frank, M Okan Irfanoglu, Pooja Modi, Kadharbatha S Saleem, David A Leopold, and Carlo Pierpaoli, "Anatomical accuracy of brain connections derived from diffusion mri tractography is inherently limited," *Proceedings of the National Academy of Sciences* **111**, 16574–16579 (2014).
- [73] Colin Reveley, Anil K Seth, Carlo Pierpaoli, Afonso C Silva, David Yu, Richard C Saunders, David A Leopold, and Q Ye Frank, "Superficial white matter fiber systems impede detection of long-range cortical connections in diffusion mr tractography," *Proceedings of the National Academy of Sciences* **112**, E2820–E2828 (2015).
- [74] Maedbh King, Carlos R Hernandez-Castillo, Russell A Poldrack, Richard B Ivry, and Jörn Diedrichsen, "Functional boundaries in the human cerebellum revealed by a multi-domain task battery," *Nature neuroscience* **22**, 1371–1378 (2019).
- [75] Cassiano O Becker, Sérgio Pequito, George J Pappas, Michael B Miller, Scott T Grafton, Danielle S Bassett, and Victor M Preciado, "Spectral mapping of brain functional connectivity from diffusion imaging," *Scientific reports* **8**, 1–15 (2018).
- [76] T Sarwar, Y Tian, BTT Yeo, K Ramamohanarao, and A Zalesky, "Structure-function coupling in the human connectome: A machine learning approach," *NeuroImage* **226**, 117609 (2021).
- [77] Gideon Rosenthal, František Váša, Alessandra Griffa, Patric Hagmann, Enrico Amico, Joaquín Goñi, Galia Avidan, and Olaf Sporns, "Mapping higher-order relations between brain structure and function with embedded vector representations of connectomes," *Nature communications* **9**, 1–12 (2018).
- [78] Gidon Levakov, Joshua Faskowitz, Galia Avidan, and Olaf Sporns, "Mapping structure to function and behavior with individual-level connectome embedding," *bioRxiv* (2021).
- [79] Matthew F Glasser, Stamatios N Sotiropoulos, J Anthony Wilson, Timothy S Coalson, Bruce Fischl, Jesper L Andersson, Junqian Xu, Saad Jbabdi, Matthew Webster, Jonathan R Polimeni, *et al.*, "The minimal preprocessing pipelines for the human connectome project," *Neuroimage* **80**, 105–124 (2013).
- [80] Oscar Esteban, Daniel Birman, Marie Schaer, Oluwasanmi O Koyejo, Russell A Poldrack, and Krzysztof J Gorgolewski, "Mriqc: Advancing the automatic prediction of image quality in mri from unseen sites," *PloS one* **12**, e0184661 (2017).
- [81] David R Roalf, Megan Quarmley, Mark A Elliott, Theodore D Satterthwaite, Simon N Vandekar, Kosha Ruparel, Efsthios D Gennatas, Monica E Calkins, Tyler M Moore, Ryan Hopson, *et al.*, "The impact of quality assurance assessment on diffusion tensor imaging outcomes in a large-scale population-based cohort," *Neuroimage* **125**, 903–919 (2016).
- [82] Matteo Bastiani, Michiel Cottaar, Sean P Fitzgibbon, Sana Suri, Fidel Alfaró-Almagro, Stamatios N Sotiropoulos, Saad Jbabdi, and Jesper LR Andersson, "Automated quality control for within and between studies diffusion mri data using a non-parametric framework for movement and distortion correction," *Neuroimage* **184**, 801–812 (2019).
- [83] Emma C Robinson, Saad Jbabdi, Matthew F Glasser, Jesper Andersson, Gregory C Burgess, Michael P Harms, Stephen M Smith, David C Van Essen, and Mark Jenkinson, "Msm: a new flexible framework for multimodal surface matching," *Neuroimage* **100**, 414–426 (2014).
- [84] Douglas N Greve and Bruce Fischl, "Accurate and robust brain image alignment using boundary-based registration," *Neuroimage* **48**, 63–72 (2009).
- [85] Nicholas J Tustison, Brian B Avants, Philip A Cook, Yuanjie Zheng, Alexander Egan, Paul A Yushkevich, and James C Gee, "N4itk: improved n3 bias correction," *IEEE transactions on medical imaging* **29**, 1310–1320 (2010).
- [86] Eleftherios Garyfallidis, Matthew Brett, Bagrat Amirbekian, Ariel Rokem, Stefan Van Der Walt, Maxime Descoteaux, and Ian Nimmo-Smith, "Dipy, a library for the analysis of diffusion mri data," *Frontiers in neuroinformatics* **8**, 8 (2014).
- [87] J-Donald Tournier, Fernando Calamante, and Alan Connelly, "Robust determination of the fibre orientation distribution in diffusion mri: non-negativity constrained super-resolved spherical deconvolution," *Neuroimage* **35**, 1459–1472 (2007).
- [88] Yongyue Zhang, Michael Brady, and Stephen Smith, "Segmentation of brain mr images through a hidden markov random field model and the expectation-maximization algorithm," *IEEE transactions on medical imaging* **20**, 45–57 (2001).
- [89] Hiromasa Takemura, Cesar F Caiafa, Brian A Wandell, and Franco Pestilli, "Ensemble tractography," *PLoS computational biology* **12**, e1004692 (2016).
- [90] Robert E Smith, Jacques-Donald Tournier, Fernando Calamante, and Alan Connelly, "Anatomically-constrained tractography: improved diffusion mri streamlines tractography through effective use of anatomical information," *Neuroimage* **62**, 1924–1938 (2012).
- [91] Keshi M Jordan, Bagrat Amirbekian, Anisha Keshavan, and Roland G Henry, "Cluster confidence index: a streamline-wise pathway reproducibility metric for diffusion-weighted mri tractography," *Journal of Neuroimaging* **28**, 64–69 (2018).
- [92] Krzysztof Gorgolewski, Christopher D Burns, Cindee Madison, Dav Clark, Yaroslav O Halchenko, Michael L Waskom, and Satrajit S Ghosh, "Nipype: a flexible, lightweight and extensible neuroimaging data processing framework in python," *Frontiers in neuroinformatics* **5**, 13 (2011).
- [93] Alexandre Abraham, Fabian Pedregosa, Michael Eickenberg, Philippe Gervais, Andreas Mueller, Jean Kossai, Alexandre Gramfort, Bertrand Thirion, and Gaël Varoquaux, "Machine learning for neuroimaging with

- scikit-learn,” *Frontiers in neuroinformatics* **8**, 14 (2014).
- [94] Arno Klein, Satrajit S Ghosh, Forrest S Bao, Joachim Giard, Yrjö Häme, Eliezer Stavsky, Noah Lee, Brian Rossa, Martin Reuter, Elias Chaibub Neto, *et al.*, “Mindboggling morphometry of human brains,” *PLoS computational biology* **13**, e1005350 (2017).
- [95] Sijia Wang, Daniel J Peterson, J Christopher Gatenby, Wenbin Li, Thomas J Grabowski, and Tara M Madhyastha, “Evaluation of field map and nonlinear registration methods for correction of susceptibility artifacts in diffusion mri,” *Frontiers in neuroinformatics* **11**, 17 (2017).
- [96] Jeffrey Mark Treiber, Nathan S White, Tyler Christian Steed, Hauke Bartsch, Dominic Holland, Nikdokht Farid, Carrie R McDonald, Bob S Carter, Anders Martin Dale, and Clark C Chen, “Characterization and correction of geometric distortions in 814 diffusion weighted images,” *PloS one* **11**, e0152472 (2016).
- [97] Jonathan D Power, Anish Mitra, Timothy O Laumann, Abraham Z Snyder, Bradley L Schlaggar, and Steven E Petersen, “Methods to detect, characterize, and remove motion artifact in resting state fmri,” *Neuroimage* **84**, 320–341 (2014).
- [98] Benjamin Ades-Aron, Jelle Veraart, Peter Kochunov, Stephen McGuire, Paul Sherman, Elias Kellner, Dmitry S Novikov, and Els Fieremans, “Evaluation of the accuracy and precision of the diffusion parameter estimation with gibbs and noise removal pipeline,” *NeuroImage* **183**, 532–543 (2018).
- [99] J-Donald Tournier, Robert Smith, David Raffelt, Rami Tabbara, Thijs Dhollander, Maximilian Pietsch, Daan Christiaens, Ben Jeurissen, Chun-Hung Yeh, and Alan Connelly, “Mrtrix3: A fast, flexible and open software framework for medical image processing and visualisation,” *NeuroImage* **202**, 116137 (2019).
- [100] Jesper LR Andersson and Stamatios N Sotiropoulos, “An integrated approach to correction for off-resonance effects and subject movement in diffusion mr imaging,” *Neuroimage* **125**, 1063–1078 (2016).
- [101] Chantal MW Tax, Ben Jeurissen, Sjoerd B Vos, Max A Viergever, and Alexander Leemans, “Recursive calibration of the fiber response function for spherical deconvolution of diffusion mri data,” *Neuroimage* **86**, 67–80 (2014).
- [102] Bruce Fischl, André Van Der Kouwe, Christophe Destrieux, Eric Halgren, Florent Ségonne, David H Salat, Evelina Busa, Larry J Seidman, Jill Goldstein, David Kennedy, *et al.*, “Automatically parcellating the human cerebral cortex,” *Cerebral cortex* **14**, 11–22 (2004).
- [103] Linden Parkes, Ben Fulcher, Murat Yücel, and Alex Fornito, “An evaluation of the efficacy, reliability, and sensitivity of motion correction strategies for resting-state functional mri,” *Neuroimage* **171**, 415–436 (2018).
- [104] Richard F Betzel, Alessandra Griffo, Andrea Avena-Koenigsberger, Joaquín Goñi, Jean-Philippe Thiran, Patric Hagmann, and Olaf Sporns, “Multi-scale community organization of the human structural connectome and its relationship with resting-state functional connectivity,” *Network Science* **1**, 353–373 (2013).
- [105] Joaquín Goñi, Andrea Avena-Koenigsberger, Nieves Velez de Mendizabal, Martijn P van den Heuvel, Richard F Betzel, and Olaf Sporns, “Exploring the morphospace of communication efficiency in complex networks,” *PLoS One* **8**, e58070 (2013).
- [106] Stephen P Borgatti and Martin G Everett, “Models of core/periphery structures,” *Social networks* **21**, 375–395 (2000).
- [107] Puck Rombach, Mason A Porter, James H Fowler, and Peter J Mucha, “Core-periphery structure in networks (revisited),” *SIAM review* **59**, 619–646 (2017).
- [108] Mark EJ Newman and Michelle Girvan, “Finding and evaluating community structure in networks,” *Physical review E* **69**, 026113 (2004).
- [109] Vincent A Traag, Paul Van Dooren, and Yurii Nesterov, “Narrow scope for resolution-limit-free community detection,” *Physical Review E* **84**, 016114 (2011).
- [110] Inderjit S Jutla, Lucas GS Jeub, and Peter J Mucha, “A generalized louvain method for community detection implemented in matlab,” URL <http://netwiki.amath.unc.edu/GenLouvain> (2011).
- [111] Richard F Betzel, Maxwell A Bertolero, Evan M Gordon, Caterina Gratton, Nico UF Dosenbach, and Danielle S Bassett, “The community structure of functional brain networks exhibits scale-specific patterns of inter-and intra-subject variability,” *Neuroimage* **202**, 115990 (2019).
- [112] Richard F Betzel, Lisa Byrge, Farnaz Zamani Esfahlani, and Daniel P Kennedy, “Temporal fluctuations in the brain’s modular architecture during movie-watching,” *NeuroImage* , 116687 (2020).
- [113] Richard F Betzel, “Organizing principles of whole-brain functional connectivity in zebrafish larvae,” *Network Neuroscience* **4**, 234–256 (2020).

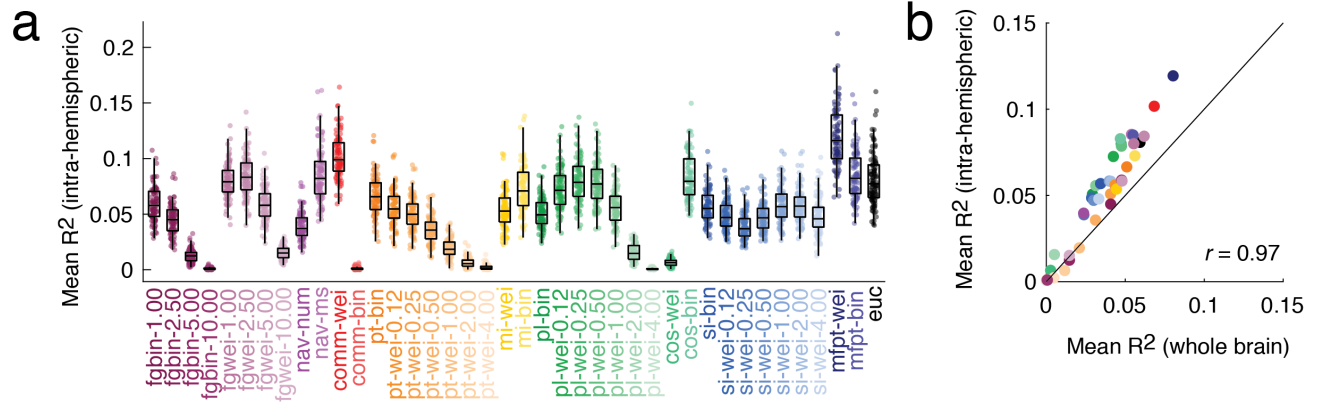

FIG. S1. **Analysis of single hemisphere instead of whole-brain data.** (a) Variance in single-hemisphere FC weights explained by factors. Each point represents a subject. To obtain these data, we generated predictors using SC data from the right and left hemispheres separately. Then we used these data to make predictions about FC data from the same hemisphere. Here, we plot the average variance explained over right and left hemispheres. (b) Mean  $R^2$  estimated using whole-brain *versus* single-hemisphere data. The black line is an identity line. Note that single-hemisphere data results in improved fits.

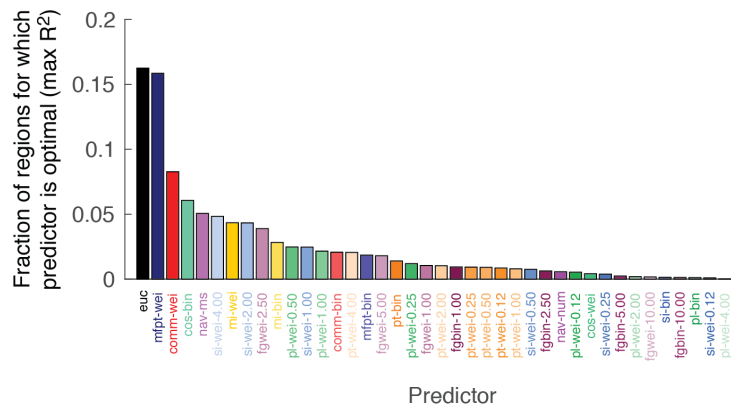

FIG. S2. **Frequency of optimal predictors for modeling local structure-function relationships.** Frequency across subjects and nodes with which each of the 40 predictors best-explained regional patterns of FC.

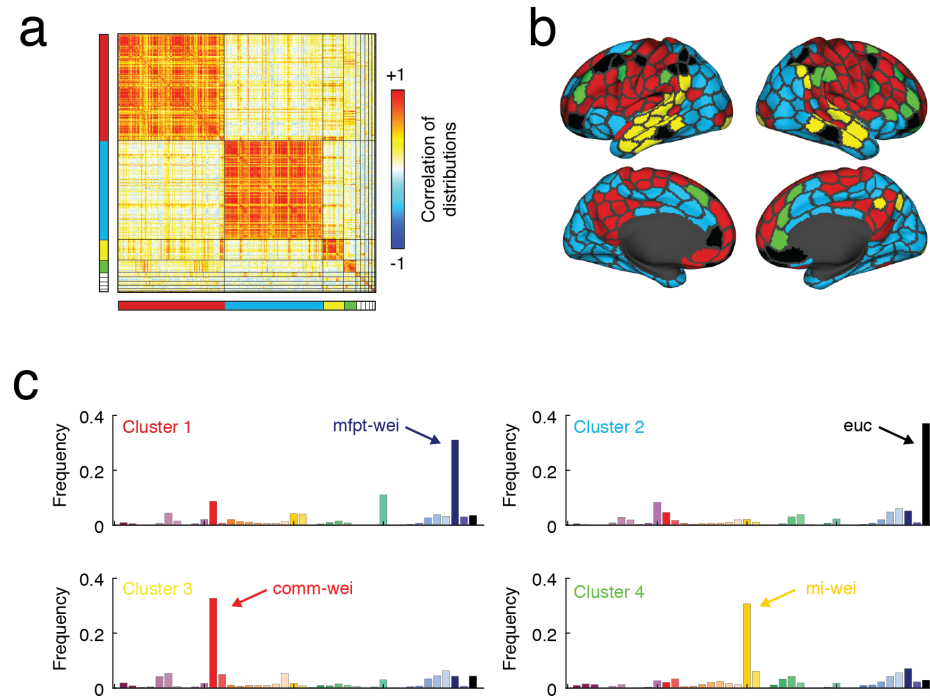

FIG. S3. **Cluster analysis of correlated regional fingerprints.** For each brain region we obtained a  $40 \times 1$  vector whose elements denoted the frequency with which each of the predictors was “optimal” in the HCP dataset. We then computed the region-by-region correlation matrix and used modularity maximization to cluster this matrix and, again, to obtain consensus communities. (a) Correlation matrix ordered by consensus communities. Here we only label the four largest communities (red, cyan, yellow, green). (b) Consensus community assignments projected onto the cortical surface. (c) Mean “fingerprint” for each of the four largest communities.

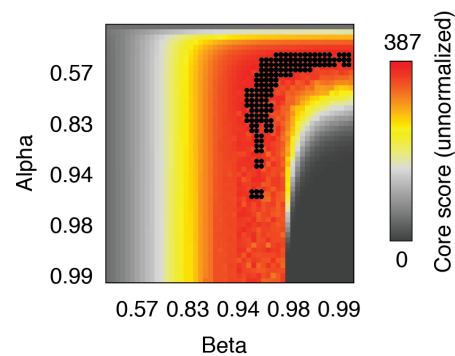

FIG. S4. **Core-periphery analysis.** Core score estimates at every point in parameter space. Black points indicate parameter values (top 5% of core scores) that were included in the core-periphery analysis.

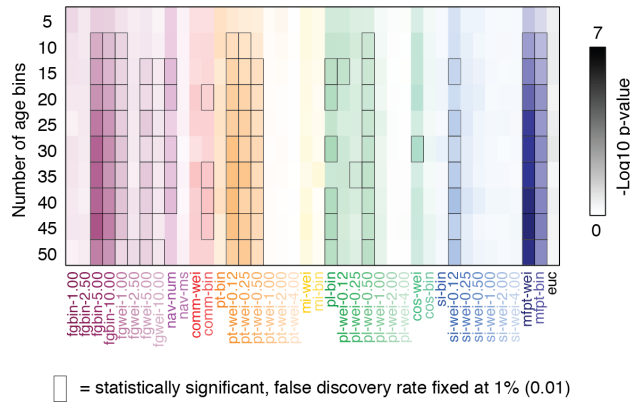

FIG. S5. **Effect of bin size on the correlation of predictor frequency with age.** In the main text we reported a correlation between the frequency with which given predictors are optimal for a given region and age. In that analysis, we partitioned subjects into ten age bins. Here, we show that these correlations persist across a broad range of age bins (from 5 to 50 in increments of 5).

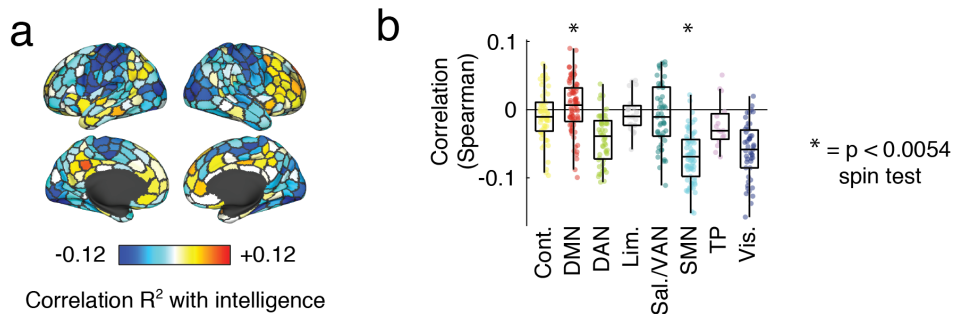

FIG. S6. **Structure-function relationships are linked to intelligence.** We calculated the regional correlation of the structure-function coupling ( $R^2$ ) with four measures of intelligence: (1) Wechsler Individual Achievement Test Composite score, (2-4) Wechsler Abbreviated Scale of Intelligence full scale IQ, verbal comprehension, and perceptual reasoning index. These scores were highly correlated ( $r = 0.72 \pm 0.13$ ) and we report their mean correlation with  $R^2$ . (a) Spatial distribution of intelligence- $R^2$  associations projected onto cerebral cortex. (b) Correlation coefficients grouped by brain system. We compared the mean correlation of systems with a null distribution generated using a spin test (1000 permutations) and found that positive correlations were overly expressed in the default mode while negative correlations were overly expressed in the somatomotor network.
